# Supplementary material for: Comparative Analysis of Cell Mixtures Deconvolution and Gene Signatures Generated for Blood, Immune and Cancer Cells
Source: Preprints.org preprint supplement (doi:10.20944/preprints202304.1073.v1), 2023-04-27
Supplement: Supplementary file 1 [file supplementary]

## Sheet: 547 genes
GeneSymbol	Neutrophils	Monocytes	Bcell	NK	Tcell
ABCB4	-0.474662	-0.510325	1.78514	-0.461007	-0.339144
ABCB9	-0.430587	-0.596639	-0.380669	-0.373694	1.78159
ACAP1	-0.432889	-0.563073	-0.451879	-0.335145	1.78299
ACHE	-0.490186	-0.60815	-0.324066	-0.354922	1.77732
ACP5	-0.788007	-0.661864	0.581352	-0.620693	1.48921
ADAM28	-0.481169	-0.534986	1.78482	-0.359327	-0.409341
ADAMDEC1	-0.559862	-0.826572	1.13731	-0.791634	1.04076
ADAMTS3	-0.410776	-0.885007	0.46113	-0.697811	1.53246
ADRB2	-0.761119	-0.797302	-0.627813	1.07023	1.116
AIF1	0.710161	1.33815	-0.919772	-0.897614	-0.230927
AIM2	-0.618606	-0.715954	0.917496	-0.834532	1.2516
ALOX15	-0.311509	-0.930076	-0.436083	-0.00983179	1.6875
ALOX5	0.539303	-0.0598889	1.37494	-1.14605	-0.7083
AMPD1	-0.515107	-0.875237	0.951887	-0.772339	1.2108
ANGPT4	-0.434287	-0.551762	-0.370164	-0.428752	1.78497
ANKRD55	-0.376055	-0.555537	-0.321374	-0.527146	1.78011
APOBEC3A	1.64461	0.215223	-0.787501	-0.700228	-0.372103
APOBEC3G	-0.832349	-0.776167	-0.558745	1.23205	0.935208
APOL3	-0.737599	-0.435423	-0.519143	-0.0385455	1.73071
APOL6	-0.589789	-0.635836	-0.527251	1.72307	0.0298019
AQP9	1.77135	-0.203172	-0.543089	-0.531306	-0.49378
ARHGAP22	-1.00039	-0.56077	-0.201118	0.142394	1.61989
ARRB1	-0.788473	1.62998	-0.79809	0.182716	-0.226134
ASGR1	-0.581859	1.67981	-0.56105	-0.704773	0.167868
ASGR2	-0.602869	1.71831	-0.579793	-0.587461	0.0518107
ATHL1	-0.329408	-0.602902	-0.416614	-0.431122	1.78005
ATP8B4	-0.669939	-0.4771	-0.491016	1.75199	-0.113937
ATXN8OS	-0.563303	-0.697475	-0.0141596	-0.454155	1.72909
AZU1	-0.582327	-0.509926	-0.67951	1.7134	0.0583653
BACH2	-0.809808	-0.840885	1.32736	-0.479802	0.803132
BANK1	-0.455712	-0.449368	1.78878	-0.451561	-0.432142
BARX2	-0.365739	-0.535428	-0.4544	-0.429983	1.78555
BCL11B	-0.473755	-0.480743	-0.461935	-0.370653	1.78709
BCL2A1	1.60917	-0.328186	-0.872612	-0.682739	0.274365
BCL7A	-0.589256	-0.696297	1.63813	-0.635815	0.283239
BEND5	-0.682568	-0.804706	1.35464	-0.65573	0.788364
BFSP1	-0.511069	-0.495497	-0.500052	-0.273407	1.78002
BHLHE41	-0.674478	-0.817218	1.49265	-0.570228	0.569277
BIRC3	-0.726338	-0.718185	0.0865234	-0.327747	1.68575
BLK	-0.489061	-0.478159	1.78511	-0.483468	-0.334419
BMP2K	0.380715	-0.636962	-0.00430131	-1.17651	1.43706
BPI	-0.614866	-0.0688936	-0.705278	1.73256	-0.343523
BRAF	-0.482288	-0.822829	1.62544	-0.605686	0.285359
BRSK2	-0.522726	-0.523945	-0.486745	-0.243153	1.77657
BST1	1.15533	0.909271	-1.01927	-0.878452	-0.166873
BTNL8	1.77111	-0.53379	-0.51526	-0.52239	-0.199666
C11orf80	-0.818237	-0.855062	1.07976	-0.496115	1.08966
C1orf54	-0.730045	0.00429046	-0.652067	-0.333985	1.71181
C3AR1	-0.542063	0.382008	-1.3504	0.209361	1.30109
C5AR1	1.69853	0.115597	-0.657949	-0.591812	-0.564362
C5AR2	1.6876	-0.547828	-0.767956	-0.496568	0.124755
CA8	-0.450486	-0.525473	-0.379599	-0.430841	1.7864
CAMP	0.880523	-0.855828	-0.936617	1.23029	-0.318373
CASP5	1.65393	-0.411483	-0.857941	-0.569878	0.185369
CCDC102B	-0.656048	-0.683274	-0.38906	0.0104588	1.71792
CCL1	-0.732571	-0.682769	-0.437581	0.188547	1.66437
CCL13	-0.809295	-0.910076	0.636266	-0.331778	1.41488
CCL14	0.00851331	-0.672422	-0.558974	-0.503818	1.7267
CCL17	-0.585871	-0.481104	-0.37641	-0.337064	1.78045
CCL18	-0.541181	-0.616493	-0.608444	0.0472141	1.7189
CCL19	-0.923716	-0.939795	0.0253804	0.38356	1.45457
CCL20	-0.46426	-0.468606	-0.410986	-0.44454	1.78839
CCL22	-0.474786	-0.56548	-0.415688	-0.326089	1.78204
CCL23	-0.417858	-0.767262	-0.79511	0.422731	1.5575
CCL4	-0.654742	-0.639413	-0.664349	1.61298	0.34552
CCL5	-0.722314	-0.72402	-0.723743	0.890572	1.27951
CCL7	-0.280385	-0.768562	-0.0475114	-0.619532	1.71599
CCL8	-0.78141	-0.575936	0.699437	-0.755495	1.4134
CCND2	-0.757761	-0.791283	-0.634132	1.17649	1.00669
CCR10	-0.491219	-0.590617	-0.325385	-0.371997	1.77922
CCR2	-0.835288	1.07034	-0.451495	-0.873969	1.09041
CCR3	1.70647	-0.718097	-0.56965	-0.492327	0.0736063
CCR5	-0.689473	-0.510247	-0.642502	0.161318	1.68091
CCR6	-0.710554	-0.738022	0.338874	-0.498687	1.60839
CCR7	-0.563198	-0.580824	-0.114081	-0.498118	1.75622
CD160	-0.743038	-0.805351	-0.519206	0.590934	1.47666
CD180	-0.586214	-0.285076	1.76618	-0.613711	-0.281177
CD19	-0.469474	-0.486452	1.78592	-0.482073	-0.347923
CD1A	-0.623239	-0.749838	1.36572	-0.765769	0.773127
CD1B	-0.443254	-0.700648	1.71942	-0.596459	0.020937
CD1C	-0.4856	-0.333123	1.77931	-0.594136	-0.366449
CD1D	-0.599174	1.7447	-0.136337	-0.690593	-0.318597
CD1E	-0.719694	-0.368823	-0.283271	-0.392269	1.76406
CD2	-0.520367	-0.533017	-0.511366	-0.207422	1.77217
CD209	-0.229425	-0.518045	-0.447802	-0.577976	1.77325
CD22	-0.482979	-0.501553	1.78386	-0.482013	-0.317313
CD244	-0.860972	-0.343484	-0.830081	1.45433	0.580209
CD247	-0.712716	-0.713879	-0.711887	0.761768	1.37671
CD27	-0.521855	-0.534557	-0.193858	-0.520017	1.77029
CD28	-0.450788	-0.480024	-0.398182	-0.459048	1.78804
CD300A	0.022636	-0.503359	-1.0662	1.61395	-0.0670281
CD33	-0.53506	1.76382	-0.526622	-0.549584	-0.152555
CD37	-0.782425	-0.664169	1.18195	-0.737927	1.00258
CD38	-0.838079	-0.961022	-0.197845	0.585543	1.4114
CD3D	-0.447809	-0.451983	-0.447162	-0.441888	1.78884
CD3E	-0.45856	-0.50571	-0.363193	-0.458986	1.78645
CD3G	-0.449573	-0.468562	-0.452019	-0.418407	1.78856
CD4	-0.525291	-0.146951	-0.538974	-0.551643	1.76286
CD40	-0.684963	-0.664172	1.61848	-0.600484	0.331142
CD40LG	-0.458592	-0.476123	-0.415068	-0.438608	1.78839
CD5	-0.493856	-0.473437	-0.385981	-0.434063	1.78734
CD6	-0.480969	-0.492734	-0.478864	-0.332394	1.78496
CD68	-0.637451	1.7048	-0.711977	-0.419818	0.0644465
CD69	-0.834703	-0.869196	0.361982	-0.199778	1.5417
CD7	-0.56061	-0.561231	-0.559591	-0.0659232	1.74735
CD70	-0.547718	-0.633016	-0.096386	-0.473754	1.75087
CD72	-0.522183	-0.522434	1.78287	-0.40954	-0.32871
CD79A	-0.487895	-0.497004	1.78361	-0.485095	-0.313619
CD79B	-0.585877	-0.602301	1.74384	-0.499885	-0.0557794
CD80	-0.734208	-0.697034	0.0752096	-0.33441	1.69044
CD86	-1.04944	1.28345	0.446411	-0.980781	0.300364
CD8A	-0.514024	-0.600346	-0.454503	-0.199969	1.76884
CD8B	-0.446804	-0.456089	-0.442059	-0.443876	1.78883
CD96	-0.620419	-0.631717	-0.57296	0.130804	1.69429
CDA	1.72246	0.028317	-0.651915	-0.591803	-0.507058
CDC25A	-0.660256	-0.681442	-0.5912	0.302319	1.63058
CDH12	-0.447637	-0.543197	-0.422385	-0.372176	1.78539
CDHR1	-0.705651	-0.820684	-0.641949	0.902887	1.2654
CDK6	-0.797074	-0.787195	-0.592302	0.975491	1.20108
CEACAM3	1.75678	-0.516891	-0.654015	-0.44653	-0.139347
CEACAM8	-0.456587	-0.780244	-0.422832	1.7317	-0.0720341
CEMP1	-0.505382	-0.5953	-0.381569	-0.29475	1.777
CFP	0.451436	1.5066	-0.866267	-0.845864	-0.245901
CHI3L1	1.78032	-0.517901	-0.513654	-0.279374	-0.469396
CHI3L2	-0.498361	-0.550307	-0.277488	-0.453267	1.77942
CHST15	1.37758	0.736708	-0.567719	-0.916956	-0.629615
CHST7	0.599496	-0.364148	-0.860647	-0.821324	1.44662
CLC	1.76466	-0.707177	-0.436806	-0.345441	-0.275234
CLCA3P	-0.637134	-0.788132	0.63627	-0.667766	1.45676
CLEC10A	-0.759259	0.799911	-0.480154	-0.888522	1.32802
CLEC2D	-0.589466	-0.584383	-0.268255	-0.327575	1.76968
CLEC4A	1.08808	1.07906	-0.726529	-0.927921	-0.512683
CLEC7A	0.886285	1.21696	-0.898245	-0.919249	-0.285749
CLIC2	-1.00629	1.47199	-0.861317	0.181908	0.213703
CMA1	-0.784426	-0.694727	0.0500879	-0.254592	1.68366
COL8A2	-0.566548	0.0464194	-0.414063	-0.771666	1.70586
COLQ	-0.723021	-0.737131	-0.689436	0.80259	1.347
CPA3	-0.557712	-1.29809	1.19565	-0.0920987	0.752249
CR2	-0.631422	-0.628985	1.69362	-0.565535	0.132324
CREB5	1.74085	-0.0465635	-0.579398	-0.628387	-0.486505
CRISP3	-0.603217	-0.639614	-0.5098	0.0303635	1.72227
CRTAM	-0.608114	-0.518758	-0.582278	-0.0290083	1.73816
CRYBB1	-0.573612	-0.590561	-0.298379	-0.308832	1.77138
CSF1	-0.499154	-0.490062	-0.403865	-0.393699	1.78678
CSF2	-0.693001	-0.681483	-0.657831	0.48822	1.54409
CSF3R	1.73936	-0.0413375	-0.614458	-0.606263	-0.477299
CST7	-0.593561	-0.794338	-0.795448	1.10709	1.07626
CTLA4	-0.444924	-0.449988	-0.446753	-0.447186	1.78885
CTSG	-0.728229	-1.06817	0.210252	0.0766318	1.50951
CTSW	-0.693571	-0.694006	-0.692312	1.48438	0.595506
CXCL10	-1.01589	-0.994104	0.029617	0.895576	1.0848
CXCL11	-0.818499	-1.27705	0.306502	0.944199	0.844843
CXCL13	-0.448341	-0.452747	-0.438576	-0.449165	1.78883
CXCL3	-0.63	0.318113	-0.387484	-0.896749	1.59612
CXCL5	-0.50958	-0.883598	0.587619	-0.667225	1.47279
CXCL9	-0.838783	-1.19955	0.815705	0.139759	1.08287
CXCR1	1.70921	-0.759711	-0.596826	-0.380097	0.0274199
CXCR2	1.78593	-0.465457	-0.513744	-0.356196	-0.450536
CXCR5	-0.562703	-0.566301	-0.0644369	-0.553577	1.74702
CXCR6	-0.475504	-0.523231	-0.403783	-0.383535	1.78605
CXorf57	-0.547979	-0.558627	-0.428084	-0.239324	1.77401
CYP27A1	-0.658097	1.64679	-0.641404	-0.611416	0.264127
CYP27B1	-0.570066	-0.901972	1.03724	-0.702133	1.13693
DACH1	0.84139	0.185526	-1.61665	-0.189996	0.779731
DAPK2	1.54364	-0.924564	-0.631394	-0.420228	0.432542
DCSTAMP	-0.461296	-0.383332	-0.721449	-0.189966	1.75604
DEFA4	-0.575997	-0.83883	-0.44357	1.65066	0.207734
DENND5B	-0.751043	-0.868412	1.56523	-0.312277	0.366498
DEPDC5	-0.664678	-0.611436	-0.543954	0.125134	1.69493
DGKA	-0.480499	-0.482389	-0.398661	-0.426155	1.7877
DHRS11	-0.620536	-0.655371	-0.293442	-0.181732	1.75108
DHX58	-0.63372	-0.444451	-0.590215	-0.0770567	1.74544
DPEP2	1.32329	-0.470188	-0.667636	-0.977291	0.791824
DPP4	-0.499418	-0.499379	-0.491201	-0.291793	1.78179
DSC1	-0.475577	-0.516235	-0.321636	-0.470509	1.78396
DUSP2	-0.486064	-0.440711	-0.47691	-0.383723	1.78741
EAF2	-0.65211	-0.438193	1.74273	-0.583913	-0.0685097
EBI3	-0.501894	-0.495876	-0.392343	-0.396288	1.7864
EFNA5	-0.433649	-0.525484	-0.535335	-0.285363	1.77983
EGR2	-0.659959	-0.499984	-0.64655	0.108032	1.69846
ELANE	-0.528048	-0.535716	-0.55941	1.76129	-0.138121
EMR1	-0.147476	0.644045	-0.670847	-1.1575	1.33177
EMR2	1.71845	0.0344965	-0.647172	-0.641017	-0.464759
EMR3	1.75399	-0.41888	-0.58381	-0.625651	-0.125649
EPB41	-0.59759	-0.577289	-0.426986	-0.159359	1.76122
EPHA1	-0.51612	-0.52715	-0.483726	-0.250376	1.77737
EPN2	-0.490692	-0.620962	-0.228674	-0.43054	1.77087
ETS1	-0.699619	-0.766623	-0.0473597	-0.185294	1.6989
ETV3	-0.511051	-0.510247	-0.374675	-0.389148	1.78512
FAIM3	-0.717731	-0.758346	0.520689	-0.56688	1.52227
FAM124B	-0.758621	-0.490776	-0.265849	-0.233581	1.74883
FAM174B	-0.453387	-0.647402	-0.124109	-0.529856	1.75475
FAM198B	-0.635172	1.73817	-0.553829	-0.51729	-0.0318757
FAM212B	1.62326	-0.548524	-0.536872	-0.830741	0.292872
FAM65B	0.141349	-0.964996	0.452279	-0.992299	1.36367
FASLG	-0.696789	-0.789788	-0.45594	1.60219	0.340326
FBXL8	-0.505796	-0.395224	-0.497304	-0.387806	1.78613
FCER1A	-0.982906	0.807788	-0.704086	-0.426174	1.30538
FCER2	-0.499659	-0.496944	1.78367	-0.47149	-0.315581
FCGR2B	-0.231874	-0.539299	1.77472	-0.535121	-0.468423
FCGR3B	1.78832	-0.477925	-0.459208	-0.439356	-0.411829
FCN1	-0.243505	1.74876	-0.660787	-0.633583	-0.210887
FCRL2	-0.46664	-0.486602	1.78672	-0.470382	-0.363096
FES	0.420993	1.32529	-1.18146	0.223067	-0.787892
FFAR2	1.78849	-0.438169	-0.479402	-0.445914	-0.425009
FLJ13197	-0.749426	-0.735883	-0.110492	-0.0996899	1.69549
FLT3LG	-0.503425	-0.488583	-0.483989	-0.307066	1.78306
FLVCR2	-0.759633	0.266093	-0.653787	-0.490886	1.63821
FOSB	-0.715851	0.475665	-0.586348	-0.721615	1.54815
FOXP3	-0.42801	-0.494435	-0.379355	-0.485121	1.78692
FPR1	1.69004	0.13831	-0.648867	-0.653038	-0.526445
FPR2	1.75422	-0.134423	-0.516977	-0.672415	-0.430402
FPR3	-0.510446	-0.756148	0.458878	-0.743075	1.55079
FRK	-0.290093	-0.797536	1.62218	-0.769988	0.235436
FRMD4A	-0.724375	-0.552025	-0.116517	-0.349215	1.74213
FRMD8	-0.629128	-0.515215	-0.362	-0.264958	1.7713
FZD2	-0.678349	1.71883	-0.489534	-0.586957	0.036007
FZD3	-0.536938	-0.629093	-0.0196882	-0.550072	1.73579
GAL3ST4	-0.454161	-0.490758	-0.382547	-0.459982	1.78745
GALR1	-0.453231	-0.506637	-0.426731	-0.400884	1.78748
GFI1	-0.608979	-0.628327	-0.598978	0.146907	1.68938
GGT5	-0.529029	-0.704356	-0.411147	-0.100428	1.74496
GIPR	-0.515853	-0.537143	-0.420954	-0.307512	1.78146
GNG7	-0.315954	-0.700321	1.70908	-0.699098	0.00629679
GNLY	-0.596355	-0.6014	-0.601216	1.70666	0.0923069
GPC4	-0.49056	-0.847825	0.0851158	-0.433544	1.68681
GPR1	-0.535581	-0.514184	-0.465605	-0.263051	1.77842
GPR171	-0.493381	-0.495465	-0.490016	-0.303991	1.78285
GPR18	-1.01179	-1.02919	0.750101	0.134945	1.15593
GPR183	-0.619403	-0.604877	0.0504651	-0.544242	1.71806
GPR19	-0.464612	-0.51794	-0.441421	-0.362065	1.78604
GPR25	-0.514296	-0.540838	-0.358638	-0.368985	1.78276
GPR65	-0.321603	-0.704534	-0.876727	0.310687	1.59218
GPR97	1.69938	-0.854112	-0.590544	-0.100621	-0.154098
GRAP2	-0.614486	-0.613056	-0.589744	0.118861	1.69842
GSTT1	-0.444704	-0.511166	-0.486208	-0.343094	1.78517
GUSBP11	-0.495907	-0.525274	1.78046	-0.479319	-0.279961
GYPE	-0.737131	-0.837766	0.398766	-0.387671	1.5638
GZMA	-0.714327	-0.726041	-0.709287	1.34778	0.801876
GZMB	-0.720427	-0.7253	-0.719572	1.29815	0.867146
GZMH	-0.729693	-0.730145	-0.728467	1.02549	1.16282
GZMK	-0.474122	-0.500964	-0.471014	-0.339208	1.78531
GZMM	-0.720939	-0.736229	-0.733453	1.11594	1.07468
HAL	1.70476	-0.285947	-0.454327	-0.894847	-0.0696427
HCK	1.10344	1.08254	-0.754823	-0.806855	-0.624302
HDC	-0.881817	-1.00509	0.143639	0.291948	1.45132
HESX1	-0.575101	-0.541298	-0.406399	-0.25143	1.77423
HHEX	-0.468818	-0.127938	1.75602	-0.644043	-0.515219
HIC1	-0.63055	-0.638165	-0.602181	0.199783	1.67111
HIST1H2AE	-0.482121	-0.590986	-0.206905	-0.49054	1.77055
HIST1H2BG	-0.465889	-0.528363	-0.424182	-0.367322	1.78576
HK3	0.216498	1.66033	-0.747508	-0.565775	-0.563541
HLA-DOB	-0.490327	-0.489264	1.78698	-0.425709	-0.381679
HLA-DQA1	-0.799401	-0.739229	1.41578	-0.572024	0.694872
HMGB3P30	-0.402512	-0.607149	-0.464465	-0.303875	1.778
HNMT	-0.632119	1.75536	-0.36692	-0.600098	-0.156218
HOXA1	-0.4606	-0.677338	-0.287833	-0.343003	1.76877
HPGDS	-0.503035	-1.1092	0.192286	-0.147799	1.56774
HPSE	0.252129	0.700741	-1.05886	-1.02371	1.1297
HRH1	-0.310326	-0.777325	0.121948	-0.704225	1.66993
HSPA6	1.74974	-0.377155	-0.714563	-0.514862	-0.143156
HTR2B	-0.634425	-0.532099	-0.445243	-0.147331	1.7591
ICA1	-0.418283	-0.503772	-0.420077	-0.445655	1.78779
ICOS	-0.44888	-0.449032	-0.447306	-0.443632	1.78885
IDO1	-0.562829	-1.06254	-0.512248	1.00914	1.12848
IFI44L	-0.547451	-0.420226	-0.554604	-0.253122	1.7754
IFNA10	-0.710033	-0.777331	1.05402	-0.701684	1.13503
IFNG	-0.682736	-0.707082	-0.616746	0.437428	1.56914
IGHD	-0.459476	-0.464362	1.78821	-0.463712	-0.400659
IGHE	-0.46932	-0.702989	0.0547712	-0.594076	1.71161
IGHM	-0.506652	-0.504821	1.78016	-0.494048	-0.274634
IGKC	-0.513066	-0.505144	1.77869	-0.500028	-0.26045
IGLL3P	-0.480316	-0.482272	1.78577	-0.478444	-0.344733
IGSF6	1.46571	0.6225	-0.752961	-0.721498	-0.613747
IL12B	-0.395994	-1.0788	0.144036	-0.276211	1.60697
IL12RB2	-0.729805	-0.723731	-0.712922	1.29367	0.872787
IL17A	-0.390352	-0.574011	-0.296084	-0.517842	1.77829
IL18R1	-0.438236	-0.868801	-0.808578	0.77371	1.3419
IL18RAP	-0.300778	-0.816988	-0.813657	1.56355	0.367871
IL1A	-0.311678	-0.997603	0.246239	-0.536651	1.59969
IL1B	1.63563	-0.201117	-0.584107	-0.964413	0.114007
IL1RL1	-0.662213	-1.07489	0.337907	-0.110652	1.50985
IL21	-0.505917	-0.62097	0.0187195	-0.617257	1.72542
IL26	-0.467918	-0.473702	-0.421024	-0.425702	1.78834
IL2RA	-0.504568	-0.505966	-0.423736	-0.350875	1.78515
IL2RB	-0.755703	-0.78834	-0.6194	0.877351	1.28609
IL3	-0.46307	-0.463999	-0.43695	-0.424578	1.7886
IL4	-0.401458	-0.536949	-0.378595	-0.468427	1.78543
IL4R	-0.576367	-0.891992	1.39205	-0.644279	0.720583
IL5	-0.465675	-0.476795	-0.43462	-0.411167	1.78826
IL5RA	0.311048	-1.09116	0.100914	-0.772112	1.45131
IL7	-0.681246	-0.579331	1.68493	-0.580461	0.156112
IL7R	-0.448721	-0.47043	-0.449111	-0.420308	1.78857
IL9	-0.45739	-0.460236	-0.431385	-0.439713	1.78872
IRF8	-0.759942	-0.440587	1.74948	-0.182253	-0.366699
ITK	-0.523579	-0.535521	-0.500368	-0.213429	1.7729
KCNA3	-0.757824	-0.694636	-0.23261	-0.014596	1.69967
KCNG2	-0.908701	-0.635995	-0.0510016	-0.066456	1.66215
KIAA0226L	-0.187709	-0.538463	1.76886	-0.555663	-0.487026
KIAA0754	-0.826491	-0.588282	-0.767349	1.06674	1.11538
KIR2DL1	-0.492618	-0.51311	-0.491996	1.78095	-0.283223
KIR2DL4	-0.621813	-0.799508	-0.285354	1.70079	0.00588905
KIR2DS4	-0.670539	-0.802907	-0.232523	1.68859	0.0173749
KIR3DL2	-0.539902	-0.551897	-0.536004	1.76041	-0.132604
KIRREL	-0.496929	-0.513266	-0.392091	-0.383449	1.78574
KLRB1	-0.662331	-0.676139	-0.660056	0.419857	1.57867
KLRC3	-0.723408	-0.719584	-0.673573	1.42246	0.694104
KLRC4	-0.821825	-0.947872	-0.259674	0.627684	1.40169
KLRD1	-0.652476	-0.672062	-0.621843	1.62193	0.324453
KLRF1	-0.633897	-0.636984	-0.601334	1.67035	0.201863
KLRG1	-0.622466	-0.685735	-0.238117	-0.198966	1.74528
KLRK1	-0.753205	-0.775292	-0.660353	1.09235	1.0965
KRT18P50	-0.351848	-0.422724	-0.465078	-0.544831	1.78448
KYNU	-1.0079	1.01848	1.04735	-0.909952	-0.147977
LAG3	-0.470883	-0.471006	-0.452515	-0.393548	1.78795
LAIR2	-0.694674	-0.75377	-0.544242	0.418561	1.57412
LAMP3	-0.308815	-0.83689	-0.733602	0.268766	1.61054
LAT	-0.50431	-0.501854	-0.497669	-0.276524	1.78036
LCK	-0.519643	-0.524517	-0.497702	-0.233677	1.77554
LEF1	-0.465274	-0.471818	-0.455451	-0.39549	1.78803
LHCGR	-0.499082	-0.943331	1.16208	-0.71754	0.997878
LILRA2	1.37335	0.759963	-0.806733	-0.716479	-0.610097
LILRA3	-0.313648	1.77384	-0.596867	-0.546141	-0.317181
LILRA4	-0.497067	-0.487413	-0.191559	-0.592472	1.76851
LILRB2	0.946897	1.22352	-0.850376	-0.737494	-0.582543
LIME1	-0.461093	-0.461661	-0.465959	-0.399463	1.78818
LINC00597	-0.786252	-0.759438	-0.638763	1.16681	1.01764
LINC00921	-0.35312	-1.0011	1.46928	-0.652381	0.537319
LOC100130100	-0.643581	-0.6684	0.0694709	-0.465552	1.70806
LOC126987	-0.54829	-0.597972	-0.230069	-0.393901	1.77023
LRMP	0.0427898	-1.17795	1.06212	-0.823669	0.896708
LST1	1.48405	0.502485	-0.959379	-0.734001	-0.293155
LTA	-0.718984	-0.721293	-0.715316	0.824979	1.33061
LTB	-0.640227	-0.823431	-0.0335278	-0.197495	1.69468
LTC4S	-0.536093	-0.641985	-0.66477	0.159683	1.68316
LY86	-0.71837	0.0573087	1.6843	-0.75686	-0.266378
LY9	-0.533483	-0.543707	-0.24764	-0.451333	1.77616
MAGEA11	-0.519706	-0.623506	-0.20578	-0.418415	1.76741
MAK	1.78308	-0.503496	-0.470954	-0.500124	-0.30851
MAN1A1	-0.18246	-0.994077	-0.371887	-0.131716	1.68014
MANEA	-0.69044	-0.45342	-0.623865	0.0574028	1.71032
MAP3K13	-0.531758	-0.582422	-0.421667	-0.237263	1.77311
MAP4K1	-0.540838	-0.495802	-0.391624	-0.355527	1.78379
MAP4K2	-0.483209	-0.484641	-0.403669	-0.416092	1.78761
MAP9	-0.597393	-0.606023	-0.462154	-0.082423	1.74799
MARCH3	-0.772676	-1.05939	1.12499	-0.264957	0.972035
MARCO	-0.754572	1.50959	-0.70229	-0.599587	0.546862
MAST1	-0.256666	-0.788404	-0.250813	-0.449778	1.74566
MBL2	-0.648413	-0.828394	0.77972	-0.662	1.35909
MEFV	1.46924	0.612566	-0.724905	-0.778548	-0.578348
MEP1A	-0.60162	-0.730672	1.63958	-0.583026	0.27574
MGAM	1.78563	-0.444134	-0.511425	-0.350937	-0.479131
MICAL3	-0.878364	-0.861764	1.26987	-0.382407	0.852669
MMP12	-0.499157	-0.896036	1.35978	-0.72335	0.75876
MMP25	1.72786	-0.570564	-0.681231	-0.474204	-0.00186316
MMP9	1.69412	-0.738216	-0.581915	-0.484	0.110008
MNDA	1.57891	0.409334	-0.759345	-0.676891	-0.552005
MROH7	-0.502685	-0.548059	-0.330009	-0.401593	1.78235
MS4A1	-0.467781	-0.477114	1.78753	-0.461642	-0.380995
MS4A2	-0.579071	-0.87142	0.25958	-0.436239	1.62715
MS4A3	-0.425229	-0.943364	-0.393153	1.66279	0.0989514
MS4A6A	-0.587215	1.68142	-0.415122	-0.800567	0.121481
MSC	-0.358429	-0.561315	-0.478941	-0.38438	1.78307
MXD1	1.70078	-0.530208	-0.74377	-0.515028	0.0882278
MYB	-0.481677	-0.581704	-0.404447	-0.312214	1.78004
MZB1	-0.713735	-0.756358	0.488075	-0.557349	1.53937
NAALADL1	-0.749501	-0.703624	-0.715677	0.885504	1.2833
NCF2	1.38335	0.736955	-0.802889	-0.782816	-0.534603
NCR3	-0.790008	-0.853395	-0.51501	0.916427	1.24199
NFE2	1.5725	0.409374	-0.822135	-0.654878	-0.504861
NIPSNAP3B	-0.523962	-0.786205	1.6319	-0.603867	0.282136
NKG7	-0.715172	-0.713614	-0.714879	1.36388	0.779785
NLRP3	0.729615	1.35827	-1.0087	-0.646754	-0.432437
NMBR	-0.437695	-0.729679	1.6345	-0.731208	0.264083
NME8	-0.569921	-0.529695	-0.591608	1.74408	-0.0528573
NOD2	0.209884	1.4977	-1.20299	-0.515316	0.0107168
NOX3	-0.441032	-0.531166	-0.359857	-0.453497	1.78555
NPAS1	-0.457981	-0.546147	-0.342956	-0.437097	1.78418
NPIPB15	-0.474462	-0.925592	1.1971	-0.754246	0.9572
NPL	1.66719	0.0965264	-0.849961	-0.64565	-0.268101
NR4A3	-0.315546	-0.687903	-0.32669	-0.438529	1.76867
NTN3	-0.445331	-0.491643	-0.389632	-0.461021	1.78763
NTRK1	-0.530423	-0.633611	-0.250273	-0.354549	1.76885
ORC1	-0.627797	-0.556996	-0.497228	-0.0628126	1.74483
OSM	0.622058	-1.07757	-1.0712	0.499717	1.02699
P2RX1	1.1949	0.0606995	-1.08451	-0.915526	0.744436
P2RX5	-0.677746	-0.660382	1.65353	-0.55811	0.24271
P2RY10	-0.478672	-0.773331	-0.0887466	-0.394085	1.73484
P2RY13	1.51388	0.541555	-0.728401	-0.707115	-0.619921
P2RY14	0.815054	-1.23856	1.12017	-0.738341	0.0416735
P2RY2	-0.719488	1.58425	-0.646685	-0.624061	0.405979
PADI4	1.15037	0.964456	-1.05049	-0.727773	-0.336562
PAQR5	-0.545374	-0.673132	-0.137537	-0.396948	1.75299
PASK	-0.483536	-0.501094	-0.34703	-0.453993	1.78565
PAX7	-0.598297	-0.646187	0.259899	-0.663612	1.6482
PBXIP1	-0.411002	-0.566966	-0.338465	-0.466187	1.78262
PCDHA5	-0.463529	-0.486622	-0.459918	-0.377247	1.78732
PDCD1	-0.415196	-0.494336	-0.44641	-0.432136	1.78808
PDCD1LG2	-0.487025	-0.636047	-0.375576	-0.273961	1.77261
PDE6C	-0.697318	-0.567189	-0.558024	0.130291	1.69224
PDK1	-0.455111	-0.479983	-0.435757	-0.417522	1.78837
PGLYRP1	1.7848	-0.530786	-0.489186	-0.360515	-0.404317
PIK3IP1	-0.547804	-0.53752	-0.24077	-0.449102	1.7752
PKD2L2	-0.012567	-0.608768	-0.571334	-0.541996	1.73466
PLA1A	-0.963381	-0.069842	0.0477282	-0.642846	1.62834
PLA2G7	-0.706306	1.7157	-0.468846	-0.579781	0.0392328
PLCH2	-0.469851	-0.550867	-0.551922	-0.197186	1.76983
PLEKHF1	-0.684862	-0.687112	-0.673821	0.516849	1.52895
PLEKHG3	0.680144	-0.764114	-1.24584	0.156372	1.17344
PMCH	-0.447808	-0.448743	-0.445537	-0.446766	1.78885
PNOC	-0.458047	-0.46861	1.78685	-0.492566	-0.367627
PPBP	0.601971	-0.778631	-0.430418	-0.850114	1.45719
PPFIBP1	-0.754729	-0.587394	0.156513	-0.493018	1.67863
PRF1	-0.684626	-0.696212	-0.683988	1.50516	0.559665
PRG2	-0.762039	-0.522819	-0.0768651	-0.371018	1.73274
PRR5L	-0.729897	-0.807238	-0.601692	1.35776	0.781063
PSG2	-0.431449	-0.787058	1.63051	-0.680853	0.268855
PTGDR	-0.62154	-0.649126	-0.569201	1.68667	0.153194
PTGER2	-0.748177	-0.58776	-0.76732	0.668127	1.43513
PTGIR	-0.581003	-0.0218457	-0.572514	-0.561981	1.73734
PTPRCAP	-0.807464	-0.808019	0.0542237	-0.0776837	1.63894
PTPRG	-0.0795248	-0.997092	0.754412	-0.929411	1.25162
PVRIG	-0.697607	-0.728761	-0.495301	0.293555	1.62811
QPCT	1.60842	0.354328	-0.699184	-0.643898	-0.619664
RAB27B	-0.743922	-0.759745	-0.651013	0.828113	1.32657
RALGPS2	-0.479968	-0.532196	1.77931	-0.498026	-0.269119
RASA3	-0.643966	-0.464782	-0.606707	-0.0168569	1.73231
RASGRP2	-0.720118	-0.809507	1.02883	-0.65576	1.15656
RASGRP3	-0.551523	-0.561642	1.76123	-0.509044	-0.13902
RASSF4	-0.872212	1.52205	-0.84384	0.406629	-0.212622
RCAN3	-0.501545	-0.446693	-0.377933	-0.460907	1.78708
REN	-0.573325	-0.670698	0.0164668	-0.497019	1.72458
RENBP	-0.69835	0.887483	-0.489108	-0.954653	1.25463
REPS2	1.78338	-0.338909	-0.490152	-0.544603	-0.409713
RGS1	-0.491805	-0.506973	-0.389907	-0.397641	1.78633
RGS13	-0.918029	-0.934227	0.879937	-0.234066	1.20639
RNASE2	-0.542809	1.71561	-0.789072	-0.373211	-0.0105201
RNASE6	-0.00192625	1.29696	0.607096	-1.21589	-0.686247
RPL10L	-0.545368	-0.452643	-0.440571	-0.345797	1.78438
RPL3P7	-0.464669	-0.469833	-0.415682	-0.438249	1.78843
RRP12	0.247656	0.329043	-1.17267	-0.769173	1.36514
RRP9	-0.602871	-0.538249	-0.563557	-0.0354329	1.74011
RSAD2	-0.275696	-0.804084	-0.676367	0.0787178	1.67743
RYR1	-0.408314	-0.491088	-0.379828	-0.507039	1.78627
S100A12	0.809356	1.30567	-0.948271	-0.756995	-0.409762
S1PR5	-0.508586	-0.516366	-0.49138	1.77886	-0.262525
SAMSN1	-0.500397	-0.563256	-0.764282	0.146653	1.68128
SCN9A	-0.434884	-0.577185	-0.438211	-0.331754	1.78203
SEC31B	-0.549154	-0.452102	-0.472998	-0.307763	1.78202
SELL	-0.31208	-0.707509	0.0160951	-0.702055	1.70555
SEPT5	-0.458447	-0.500654	-0.443684	-0.384521	1.78731
SEPT8	-0.544833	-0.571122	-0.42177	-0.235326	1.77305
SERGEF	-0.54613	-0.5314	-0.50234	-0.189609	1.76948
SH2D1A	-0.5441	-0.548789	-0.541554	-0.124533	1.75898
SIGLEC1	-0.589263	-0.405087	0.303026	-0.910897	1.60222
SIK1	-0.747836	-0.720052	1.3255	-0.6888	0.83119
SIRPG	-0.449341	-0.465408	-0.431737	-0.442235	1.78872
SIT1	-0.52125	-0.555985	-0.153606	-0.533079	1.76392
SKA1	-0.52024	-0.514928	-0.493357	-0.248803	1.77733
SKAP1	-0.579633	-0.608647	-0.387624	-0.187134	1.76304
SLAMF1	-0.509426	-0.557394	-0.182021	-0.519446	1.76829
SLAMF8	-0.839435	-0.629215	-0.0510415	-0.173455	1.69315
SLC12A1	-0.679809	-0.758723	1.39146	-0.692329	0.739399
SLC12A8	-0.524166	-0.5473	-0.474994	-0.22785	1.77431
SLC15A3	0.92363	1.24372	-0.628514	-0.871931	-0.666909
SLC2A6	-1.3241	1.32189	0.465012	-0.528083	0.0652756
SLC7A10	-0.509382	-0.559094	-0.209829	-0.493739	1.77204
SLCO5A1	-0.36929	-1.10647	0.405933	-0.440361	1.51018
SMPD3	-0.251566	-0.866161	-0.354397	-0.258249	1.73037
SMPDL3B	-0.445062	-0.565059	-0.488959	-0.280005	1.77909
SOCS1	-0.685751	-0.696372	-0.665874	0.521865	1.52613
SP140	-0.81601	-0.883184	1.05009	-0.463089	1.11219
SPAG4	-0.499466	-0.525201	-0.418671	-0.340829	1.78417
SPIB	-0.447508	-0.486201	1.78753	-0.469186	-0.384634
SPOCK2	-0.532539	-0.574721	-0.270304	-0.398461	1.77602
SSX1	-0.380918	-0.465538	-0.462087	-0.478978	1.78752
ST3GAL6	1.3546	0.762171	-0.640461	-0.943347	-0.532965
ST6GALNAC4	-0.625951	-0.613058	-0.149078	-0.365845	1.75393
ST8SIA1	-0.459518	-0.464468	-0.40808	-0.456326	1.78839
STAP1	-0.666031	-0.67804	1.72141	-0.365058	-0.01228
STEAP4	1.77274	-0.298051	-0.596024	-0.556173	-0.322489
STXBP6	-0.577571	-0.623637	-0.168175	-0.390389	1.75977
TARDBPP1	-0.348447	-0.780492	-0.117512	-0.490055	1.73651
TBX21	-0.743047	-0.821239	-0.59591	1.28639	0.873805
TCF7	-0.465931	-0.47045	-0.449298	-0.402529	1.78821
TCL1A	-0.461113	-0.478978	1.78715	-0.475089	-0.371965
TEC	-0.773319	-0.641249	-0.405788	0.145565	1.67479
TEP1	-0.780644	-0.74975	-0.653735	1.1812	1.00293
TGM5	-0.571637	-0.72144	-0.165771	-0.285751	1.7446
TLR2	1.24	0.910059	-0.857859	-0.82412	-0.468079
TLR7	-0.841498	1.62453	-0.249245	-0.74029	0.206507
TLR8	1.20427	0.973925	-0.781955	-0.784708	-0.611535
TMEM156	-0.811252	-0.852912	0.825713	-0.469905	1.30836
TMEM255A	-0.972113	-0.505316	0.144606	-0.305836	1.63866
TNFAIP6	1.77514	-0.577093	-0.362554	-0.550744	-0.284749
TNFRSF10C	1.78634	-0.397313	-0.494702	-0.504224	-0.390096
TNFRSF11A	-0.472427	-0.579536	-0.441042	-0.285947	1.77895
TNFRSF13B	-0.680588	-0.862508	1.26847	-0.619705	0.894329
TNFRSF17	-0.650492	-0.643702	1.68701	-0.542353	0.14954
TNFRSF4	-0.517869	-0.521492	-0.517291	-0.216833	1.77349
TNFSF14	-0.215808	-0.802974	-0.818459	1.60821	0.229034
TNIP3	-0.472937	-0.475855	-0.400655	-0.438574	1.78802
TPSAB1	-0.248751	-1.10736	1.26654	-0.698089	0.787658
TRAC	-0.45158	-0.465414	-0.432799	-0.438921	1.78871
TRAF4	-0.786088	-0.85135	1.16749	-0.534378	1.00432
TRAT1	-0.450989	-0.451733	-0.44695	-0.43916	1.78883
TRAV12-2	-0.45814	-0.478666	-0.416284	-0.43527	1.78836
TRAV13-1	-0.453501	-0.485805	-0.391985	-0.45652	1.78781
TRAV13-2	-0.455519	-0.488143	-0.401307	-0.44302	1.78799
TRAV21	-0.455487	-0.472171	-0.411716	-0.449044	1.78842
TRAV8-6	-0.426721	-0.457888	-0.445516	-0.458581	1.78871
TRAV9-2	-0.433487	-0.472974	-0.423555	-0.458495	1.78851
TRBC1	-0.508104	-0.511158	-0.468443	-0.294048	1.78175
TRDC	-0.727528	-0.735737	-0.726943	1.06016	1.13005
TREM1	1.76191	-0.191315	-0.520853	-0.660566	-0.389171
TREM2	-0.473452	-0.479072	-0.414289	-0.421267	1.78808
TREML2	1.74161	-0.696038	-0.577525	-0.374097	-0.0939552
TRIB2	-0.649973	-0.65585	-0.183686	-0.256329	1.74584
TRPM4	-0.606765	-0.290746	-0.464301	-0.415557	1.77737
TRPM6	0.928247	-0.928306	-0.467451	-0.753366	1.22088
TSHR	-0.50349	-0.535817	-0.355754	-0.388687	1.78375
TTC38	-0.62569	-0.587046	-0.623825	1.68908	0.147484
TXK	-0.76787	-0.830483	-0.581064	1.15339	1.02603
TYR	-0.377443	-0.51021	-0.49403	-0.404291	1.78597
UBASH3A	-0.448333	-0.449689	-0.444013	-0.446815	1.78885
UGT1A8	-0.484708	-0.887718	0.856888	-0.769331	1.28487
UGT2B17	-0.742325	-0.823224	1.00233	-0.615047	1.17826
UPK3A	-0.702473	1.61739	-0.57015	-0.675409	0.330639
VILL	-0.533475	-0.457156	-0.490569	-0.30074	1.78194
VNN1	0.938192	1.2169	-0.886274	-0.790145	-0.478676
VNN2	1.76423	-0.224896	-0.637415	-0.560273	-0.341643
VNN3	1.77995	-0.40609	-0.539049	-0.535426	-0.299381
VPREB3	-0.529025	-0.537099	1.77208	-0.498259	-0.207694
WNT5B	-0.510269	-0.509316	-0.244552	-0.51279	1.77693
WNT7A	-0.48951	-0.363606	-0.456845	-0.476714	1.78667
ZAP70	-0.598268	-0.601703	-0.602942	0.09795	1.70496
ZBP1	-0.302866	-1.00328	-0.758028	0.718472	1.3457
ZBTB10	-0.605035	-0.548983	-0.29371	-0.324546	1.77227
ZBTB32	-0.686694	-0.696503	0.382805	-0.594428	1.59482
ZFP36L2	-0.584061	-0.40522	-0.352281	-0.440676	1.78224
ZNF135	-0.982846	-0.966848	-0.0837256	0.905324	1.12809
ZNF165	-0.500828	-0.564493	-0.370727	-0.345452	1.7815
ZNF204P	-0.525276	-0.519681	-0.309859	-0.427183	1.782
ZNF222	-0.62609	-0.671544	-0.690187	0.400209	1.58761
ZNF286A	-0.3564	-1.28489	0.999762	-0.392234	1.03376
ZNF324	-0.497536	-0.519901	-0.443371	-0.322829	1.78364
ZNF442	-0.549565	-0.609063	-0.382948	-0.227246	1.76882
