# Supplementary material for: Comparative Analysis of Cell Mixtures Deconvolution and Gene Signatures Generated for Blood, Immune and Cancer Cells
Source: Preprints.org preprint supplement (doi:10.20944/preprints202304.1073.v1), 2023-04-27
Supplement: Supplementary file 2 [file SupplementaryTable1S_CIBERSORT_547g_Heatmap.xlsx]

## Sheet: Ordered as in Heatmap 547g
GeneID	Ensembl_gene_id	CellType	Cluster	Cluster_Norder	Gene_biotype	Description
EMR1	ENSG00000174837	Tcell	C1	C1.001	protein-coding gene	Adhesion G protein-coupled receptors, subfamily E
HPSE	ENSG00000173083	Tcell	C1	C1.002	protein_coding	heparanase [Source:HGNC Symbol;Acc:HGNC:5164]
RRP12	ENSG00000052749	Tcell	C1	C1.003	protein_coding	ribosomal RNA processing 12 homolog [Source:HGNC Symbol;Acc:HGNC:29100]
FCER1A	ENSG00000179639	Tcell	C1	C1.004	protein_coding	Fc fragment of IgE receptor Ia [Source:HGNC Symbol;Acc:HGNC:3609]
CCR2	ENSG00000121807	Tcell	C1	C1.005	protein_coding	C-C motif chemokine receptor 2 [Source:HGNC Symbol;Acc:HGNC:1603]
CLEC10A	ENSG00000132514	Tcell	C1	C1.006	protein_coding	C-type lectin domain containing 10A [Source:HGNC Symbol;Acc:HGNC:16916]
RENBP	ENSG00000102032	Tcell	C1	C1.007	protein_coding	renin binding protein [Source:HGNC Symbol;Acc:HGNC:9959]
PLA1A	ENSG00000144837	Tcell	C1	C1.008	protein_coding	phospholipase A1 member A [Source:HGNC Symbol;Acc:HGNC:17661]
CXCL3	ENSG00000163734	Tcell	C1	C1.009	protein_coding	C-X-C motif chemokine ligand 3 [Source:HGNC Symbol;Acc:HGNC:4604]
FOSB	ENSG00000125740	Tcell	C1	C1.010	protein_coding	FosB proto-oncogene, AP-1 transcription factor subunit [Source:HGNC Symbol;Acc:HGNC:3797]
C1orf54	ENSG00000118292	Tcell	C1	C1.011	protein_coding	chromosome 1 open reading frame 54 [Source:HGNC Symbol;Acc:HGNC:26258]
FLVCR2	ENSG00000119686	Tcell	C1	C1.012	protein_coding	FLVCR heme transporter 2 [Source:HGNC Symbol;Acc:HGNC:20105]
COL8A2	ENSG00000171812	Tcell	C1	C1.013	protein_coding	collagen type VIII alpha 2 chain [Source:HGNC Symbol;Acc:HGNC:2216]
CD4	ENSG00000010610	Tcell	C1	C1.014	protein_coding	CD4 molecule [Source:HGNC Symbol;Acc:HGNC:1678]
PTGIR	ENSG00000160013	Tcell	C1	C1.015	protein_coding	prostaglandin I2 receptor [Source:HGNC Symbol;Acc:HGNC:9602]
CCL14	ENSG00000277236	Tcell	C1	C1.016	protein_coding	C-C motif chemokine ligand 14 [Source:HGNC Symbol;Acc:HGNC:10612]
PKD2L2	ENSG00000078795	Tcell	C1	C1.017	protein_coding	polycystin 2 like 2, transient receptor potential cation channel [Source:HGNC Symbol;Acc:HGNC:9012]
SMPD3	ENSG00000103056	Tcell	C1	C1.018	protein_coding	sphingomyelin phosphodiesterase 3 [Source:HGNC Symbol;Acc:HGNC:14240]
ALOX15	ENSG00000161905	Tcell	C1	C1.019	protein_coding	arachidonate 15-lipoxygenase [Source:HGNC Symbol;Acc:HGNC:433]
MAN1A1	ENSG00000111885	Tcell	C1	C1.020	protein_coding	mannosidase alpha class 1A member 1 [Source:HGNC Symbol;Acc:HGNC:6821]
TRPM4	ENSG00000130529	Tcell	C1	C1.021	protein_coding	transient receptor potential cation channel subfamily M member 4 [Source:HGNC Symbol;Acc:HGNC:17993]
FBXL8	ENSG00000135722	Tcell	C1	C1.022	protein_coding	F-box and leucine rich repeat protein 8 [Source:HGNC Symbol;Acc:HGNC:17875]
WNT7A	ENSG00000154764	Tcell	C1	C1.023	protein_coding	Wnt family member 7A [Source:HGNC Symbol;Acc:HGNC:12786]
CD1E	ENSG00000158488	Tcell	C1	C1.024	protein_coding	CD1e molecule [Source:HGNC Symbol;Acc:HGNC:1638]
ZFP36L2	ENSG00000152518	Tcell	C1	C1.025	protein_coding	ZFP36 ring finger protein like 2 [Source:HGNC Symbol;Acc:HGNC:1108]
ANKRD55	ENSG00000164512	Tcell	C1	C1.026	protein_coding	ankyrin repeat domain 55 [Source:HGNC Symbol;Acc:HGNC:25681]
IL17A	ENSG00000112115	Tcell	C1	C1.027	protein_coding	interleukin 17A [Source:HGNC Symbol;Acc:HGNC:5981]
FOXP3	ENSG00000049768	Tcell	C1	C1.028	protein_coding	forkhead box P3 [Source:HGNC Symbol;Acc:HGNC:6106]
RYR1	ENSG00000196218	Tcell	C1	C1.029	protein_coding	ryanodine receptor 1 [Source:HGNC Symbol;Acc:HGNC:10483]
DSC1	ENSG00000134765	Tcell	C1	C1.030	protein_coding	desmocollin 1 [Source:HGNC Symbol;Acc:HGNC:3035]
CD3E	ENSG00000198851	Tcell	C1	C1.031	protein_coding	CD3e molecule [Source:HGNC Symbol;Acc:HGNC:1674]
PASK	ENSG00000115687	Tcell	C1	C1.032	protein_coding	PAS domain containing serine/threonine kinase [Source:HGNC Symbol;Acc:HGNC:17270]
NPAS1	ENSG00000130751	Tcell	C1	C1.033	protein_coding	neuronal PAS domain protein 1 [Source:HGNC Symbol;Acc:HGNC:7894]
ANGPT4	ENSG00000101280	Tcell	C1	C1.034	protein_coding	angiopoietin 4 [Source:HGNC Symbol;Acc:HGNC:487]
CA8	ENSG00000178538	Tcell	C1	C1.035	protein_coding	carbonic anhydrase 8 [Source:HGNC Symbol;Acc:HGNC:1382]
NOX3	ENSG00000074771	Tcell	C1	C1.036	protein_coding	NADPH oxidase 3 [Source:HGNC Symbol;Acc:HGNC:7890]
IL4	ENSG00000113520	Tcell	C1	C1.037	protein_coding	interleukin 4 [Source:HGNC Symbol;Acc:HGNC:6014]
PBXIP1	ENSG00000163346	Tcell	C1	C1.038	protein_coding	PBX homeobox interacting protein 1 [Source:HGNC Symbol;Acc:HGNC:21199]
LY9	ENSG00000122224	Tcell	C1	C1.039	protein_coding	lymphocyte antigen 9 [Source:HGNC Symbol;Acc:HGNC:6730]
PIK3IP1	ENSG00000100100	Tcell	C1	C1.040	protein_coding	phosphoinositide-3-kinase interacting protein 1 [Source:HGNC Symbol;Acc:HGNC:24942]
CHI3L2	ENSG00000064886	Tcell	C1	C1.041	protein_coding	chitinase 3 like 2 [Source:HGNC Symbol;Acc:HGNC:1933]
ZNF204P	ENSG00000204789	Tcell	C1	C1.042	processed_pseudogene	zinc finger protein 204, pseudogene [Source:HGNC Symbol;Acc:HGNC:12995]
ACHE	ENSG00000087085	Tcell	C1	C1.043	protein_coding	acetylcholinesterase (Cartwright blood group) [Source:HGNC Symbol;Acc:HGNC:108]
CCR10	ENSG00000184451	Tcell	C1	C1.044	protein_coding	C-C motif chemokine receptor 10 [Source:HGNC Symbol;Acc:HGNC:4474]
ZNF165	ENSG00000197279	Tcell	C1	C1.045	protein_coding	zinc finger protein 165 [Source:HGNC Symbol;Acc:HGNC:12953]
MROH7	ENSG00000184313	Tcell	C1	C1.046	protein_coding	maestro heat like repeat family member 7 [Source:HGNC Symbol;Acc:HGNC:24802]
GPR25	ENSG00000170128	Tcell	C1	C1.047	protein_coding	G protein-coupled receptor 25 [Source:HGNC Symbol;Acc:HGNC:4480]
TSHR	ENSG00000165409	Tcell	C1	C1.048	protein_coding	thyroid stimulating hormone receptor [Source:HGNC Symbol;Acc:HGNC:12373]
CD209	ENSG00000090659	Tcell	C1	C1.049	protein_coding	CD209 molecule [Source:HGNC Symbol;Acc:HGNC:1641]
KRT18P50	ENSG00000219941	Tcell	C1	C1.050	processed_pseudogene	keratin 18 pseudogene 50 [Source:HGNC Symbol;Acc:HGNC:33420]
GIPR	ENSG00000010310	Tcell	C1	C1.051	protein_coding	gastric inhibitory polypeptide receptor [Source:HGNC Symbol;Acc:HGNC:4271]
ZNF324	ENSG00000083812	Tcell	C1	C1.052	protein_coding	zinc finger protein 324 [Source:HGNC Symbol;Acc:HGNC:14096]
IL2RA	ENSG00000134460	Tcell	C1	C1.053	protein_coding	interleukin 2 receptor subunit alpha [Source:HGNC Symbol;Acc:HGNC:6008]
SPAG4	ENSG00000061656	Tcell	C1	C1.054	protein_coding	sperm associated antigen 4 [Source:HGNC Symbol;Acc:HGNC:11214]
CCL17	ENSG00000102970	Tcell	C1	C1.055	protein_coding	C-C motif chemokine ligand 17 [Source:HGNC Symbol;Acc:HGNC:10615]
MAP4K1	ENSG00000282928	Tcell	C1	C1.056	protein_coding	mitogen-activated protein kinase kinase kinase kinase 1 [Source:HGNC Symbol;Acc:HGNC:6863]
DUSP2	ENSG00000158050	Tcell	C1	C1.057	protein_coding	dual specificity phosphatase 2 [Source:HGNC Symbol;Acc:HGNC:3068]
BCL11B	ENSG00000127152	Tcell	C1	C1.058	protein_coding	BAF chromatin remodeling complex subunit BCL11B [Source:HGNC Symbol;Acc:HGNC:13222]
PCDHA5	ENSG00000204965	Tcell	C1	C1.059	protein_coding	protocadherin alpha 5 [Source:HGNC Symbol;Acc:HGNC:8671]
LIME1	ENSG00000203896	Tcell	C1	C1.060	protein_coding	Lck interacting transmembrane adaptor 1 [Source:HGNC Symbol;Acc:HGNC:26016]
TCF7	ENSG00000081059	Tcell	C1	C1.061	protein_coding	transcription factor 7 [Source:HGNC Symbol;Acc:HGNC:11639]
LAG3	ENSG00000089692	Tcell	C1	C1.062	protein_coding	lymphocyte activating 3 [Source:HGNC Symbol;Acc:HGNC:6476]
LEF1	ENSG00000138795	Tcell	C1	C1.063	protein_coding	lymphoid enhancer binding factor 1 [Source:HGNC Symbol;Acc:HGNC:6551]
CSF1	ENSG00000184371	Tcell	C1	C1.064	protein_coding	colony stimulating factor 1 [Source:HGNC Symbol;Acc:HGNC:2432]
EBI3	ENSG00000105246	Tcell	C1	C1.065	protein_coding	Epstein-Barr virus induced 3 [Source:HGNC Symbol;Acc:HGNC:3129]
ETV3	ENSG00000117036	Tcell	C1	C1.066	protein_coding	ETS variant transcription factor 3 [Source:HGNC Symbol;Acc:HGNC:3492]
KIRREL	ENSG00000183853	Tcell	C1	C1.067	protein-coding gene	C2-set domain containing|I-set domain containing
RGS1	ENSG00000090104	Tcell	C1	C1.068	protein_coding	regulator of G protein signaling 1 [Source:HGNC Symbol;Acc:HGNC:9991]
GALR1	ENSG00000166573	Tcell	C1	C1.069	protein_coding	galanin receptor 1 [Source:HGNC Symbol;Acc:HGNC:4132]
SEPT5	ENSG00000184702	Tcell	C1	C1.070	protein-coding gene	Septins
CXCR6	ENSG00000172215	Tcell	C1	C1.071	protein_coding	C-X-C motif chemokine receptor 6 [Source:HGNC Symbol;Acc:HGNC:16647]
CDH12	ENSG00000154162	Tcell	C1	C1.072	protein_coding	cadherin 12 [Source:HGNC Symbol;Acc:HGNC:1751]
GPR19	ENSG00000183150	Tcell	C1	C1.073	protein_coding	G protein-coupled receptor 19 [Source:HGNC Symbol;Acc:HGNC:4473]
HIST1H2BG	ENSG00000273802	Tcell	C1	C1.074	protein-coding gene	H2B histones
ATHL1	ENSG00000142102	Tcell	C1	C1.075	protein-coding gene	Glycoside hydrolases
MSC	ENSG00000178860	Tcell	C1	C1.076	protein_coding	musculin [Source:HGNC Symbol;Acc:HGNC:7321]
BARX2	ENSG00000043039	Tcell	C1	C1.077	protein_coding	BARX homeobox 2 [Source:HGNC Symbol;Acc:HGNC:956]
TYR	ENSG00000077498	Tcell	C1	C1.078	protein_coding	tyrosinase [Source:HGNC Symbol;Acc:HGNC:12442]
CD5	ENSG00000110448	Tcell	C1	C1.079	protein_coding	CD5 molecule [Source:HGNC Symbol;Acc:HGNC:1685]
RCAN3	ENSG00000117602	Tcell	C1	C1.080	protein_coding	RCAN family member 3 [Source:HGNC Symbol;Acc:HGNC:3042]
TRAV13-2	ENSG00000211791	Tcell	C1	C1.081	TR_V_gene	T cell receptor alpha variable 13-2 [Source:HGNC Symbol;Acc:HGNC:12109]
CD28	ENSG00000178562	Tcell	C1	C1.082	protein_coding	CD28 molecule [Source:HGNC Symbol;Acc:HGNC:1653]
TRAV13-1	ENSG00000211788	Tcell	C1	C1.083	TR_V_gene	T cell receptor alpha variable 13-1 [Source:HGNC Symbol;Acc:HGNC:12108]
GAL3ST4	ENSG00000197093	Tcell	C1	C1.084	protein_coding	galactose-3-O-sulfotransferase 4 [Source:HGNC Symbol;Acc:HGNC:24145]
NTN3	ENSG00000162068	Tcell	C1	C1.085	protein_coding	netrin 3 [Source:HGNC Symbol;Acc:HGNC:8030]
ST8SIA1	ENSG00000111728	Tcell	C1	C1.086	protein_coding	ST8 alpha-N-acetyl-neuraminide alpha-2,8-sialyltransferase 1 [Source:HGNC Symbol;Acc:HGNC:10869]
TRAV21	ENSG00000211801	Tcell	C1	C1.087	TR_V_gene	T cell receptor alpha variable 21 [Source:HGNC Symbol;Acc:HGNC:12118]
TNIP3	ENSG00000050730	Tcell	C1	C1.088	protein_coding	TNFAIP3 interacting protein 3 [Source:HGNC Symbol;Acc:HGNC:19315]
CD40LG	ENSG00000102245	Tcell	C1	C1.089	protein_coding	CD40 ligand [Source:HGNC Symbol;Acc:HGNC:11935]
TRAV12-2	ENSG00000211789	Tcell	C1	C1.090	TR_V_gene	T cell receptor alpha variable 12-2 [Source:HGNC Symbol;Acc:HGNC:12106]
CCL20	ENSG00000115009	Tcell	C1	C1.091	protein_coding	C-C motif chemokine ligand 20 [Source:HGNC Symbol;Acc:HGNC:10619]
RPL3P7	ENSG00000225093	Tcell	C1	C1.092	processed_pseudogene	ribosomal protein L3 pseudogene 7 [Source:HGNC Symbol;Acc:HGNC:36797]
IL26	ENSG00000111536	Tcell	C1	C1.093	protein_coding	interleukin 26 [Source:HGNC Symbol;Acc:HGNC:17119]
TREM2	ENSG00000095970	Tcell	C1	C1.094	protein_coding	triggering receptor expressed on myeloid cells 2 [Source:HGNC Symbol;Acc:HGNC:17761]
DGKA	ENSG00000065357	Tcell	C1	C1.095	protein_coding	diacylglycerol kinase alpha [Source:HGNC Symbol;Acc:HGNC:2849]
MAP4K2	ENSG00000168067	Tcell	C1	C1.096	protein_coding	mitogen-activated protein kinase kinase kinase kinase 2 [Source:HGNC Symbol;Acc:HGNC:6864]
CD3G	ENSG00000160654	Tcell	C1	C1.097	protein_coding	CD3g molecule [Source:HGNC Symbol;Acc:HGNC:1675]
IL7R	ENSG00000168685	Tcell	C1	C1.098	protein_coding	interleukin 7 receptor [Source:HGNC Symbol;Acc:HGNC:6024]
IL3	ENSG00000164399	Tcell	C1	C1.099	protein_coding	interleukin 3 [Source:HGNC Symbol;Acc:HGNC:6011]
IL5	ENSG00000113525	Tcell	C1	C1.100	protein_coding	interleukin 5 [Source:HGNC Symbol;Acc:HGNC:6016]
PDK1	ENSG00000152256	Tcell	C1	C1.101	protein_coding	pyruvate dehydrogenase kinase 1 [Source:HGNC Symbol;Acc:HGNC:8809]
TRAV8-6	ENSG00000211795	Tcell	C1	C1.102	TR_V_gene	T cell receptor alpha variable 8-6 [Source:HGNC Symbol;Acc:HGNC:12151]
TRAV9-2	ENSG00000211793	Tcell	C1	C1.103	TR_V_gene	T cell receptor alpha variable 9-2 [Source:HGNC Symbol;Acc:HGNC:12154]
IL9	ENSG00000145839	Tcell	C1	C1.104	protein_coding	interleukin 9 [Source:HGNC Symbol;Acc:HGNC:6029]
SIRPG	ENSG00000089012	Tcell	C1	C1.105	protein_coding	signal regulatory protein gamma [Source:HGNC Symbol;Acc:HGNC:15757]
TRAC	ENSG00000277734	Tcell	C1	C1.106	TR_C_gene	T cell receptor alpha constant [Source:HGNC Symbol;Acc:HGNC:12029]
CD8B	ENSG00000172116	Tcell	C1	C1.107	protein_coding	CD8b molecule [Source:HGNC Symbol;Acc:HGNC:1707]
CXCL13	ENSG00000156234	Tcell	C1	C1.108	protein_coding	C-X-C motif chemokine ligand 13 [Source:HGNC Symbol;Acc:HGNC:10639]
CTLA4	ENSG00000163599	Tcell	C1	C1.109	protein_coding	cytotoxic T-lymphocyte associated protein 4 [Source:HGNC Symbol;Acc:HGNC:2505]
PMCH	ENSG00000183395	Tcell	C1	C1.110	protein_coding	pro-melanin concentrating hormone [Source:HGNC Symbol;Acc:HGNC:9109]
UBASH3A	ENSG00000160185	Tcell	C1	C1.111	protein_coding	ubiquitin associated and SH3 domain containing A [Source:HGNC Symbol;Acc:HGNC:12462]
TRAT1	ENSG00000163519	Tcell	C1	C1.112	protein_coding	T cell receptor associated transmembrane adaptor 1 [Source:HGNC Symbol;Acc:HGNC:30698]
CD3D	ENSG00000167286	Tcell	C1	C1.113	protein_coding	CD3d molecule [Source:HGNC Symbol;Acc:HGNC:1673]
ICOS	ENSG00000163600	Tcell	C1	C1.114	protein_coding	inducible T cell costimulator [Source:HGNC Symbol;Acc:HGNC:5351]
SSX1	ENSG00000126752	Tcell	C1	C1.115	protein_coding	SSX family member 1 [Source:HGNC Symbol;Acc:HGNC:11335]
ICA1	ENSG00000003147	Tcell	C1	C1.116	protein_coding	islet cell autoantigen 1 [Source:HGNC Symbol;Acc:HGNC:5343]
PDCD1	ENSG00000276977	Tcell	C1	C1.117	protein_coding	programmed cell death 1 [Source:HGNC Symbol;Acc:HGNC:8760]
CD7	ENSG00000173762	Tcell	C1	C1.118	protein_coding	CD7 molecule [Source:HGNC Symbol;Acc:HGNC:1695]
SH2D1A	ENSG00000183918	Tcell	C1	C1.119	protein_coding	SH2 domain containing 1A [Source:HGNC Symbol;Acc:HGNC:10820]
EPB41	ENSG00000159023	Tcell	C1	C1.120	protein_coding	erythrocyte membrane protein band 4.1 [Source:HGNC Symbol;Acc:HGNC:3377]
HTR2B	ENSG00000135914	Tcell	C1	C1.121	protein_coding	5-hydroxytryptamine receptor 2B [Source:HGNC Symbol;Acc:HGNC:5294]
MAP9	ENSG00000164114	Tcell	C1	C1.122	protein_coding	microtubule associated protein 9 [Source:HGNC Symbol;Acc:HGNC:26118]
ORC1	ENSG00000085840	Tcell	C1	C1.123	protein_coding	origin recognition complex subunit 1 [Source:HGNC Symbol;Acc:HGNC:8487]
CCDC102B	ENSG00000150636	Tcell	C1	C1.124	protein_coding	coiled-coil domain containing 102B [Source:HGNC Symbol;Acc:HGNC:26295]
GGT5	ENSG00000099998	Tcell	C1	C1.125	protein_coding	gamma-glutamyltransferase 5 [Source:HGNC Symbol;Acc:HGNC:4260]
DCSTAMP	ENSG00000164935	Tcell	C1	C1.126	protein_coding	dendrocyte expressed seven transmembrane protein [Source:HGNC Symbol;Acc:HGNC:18549]
APOL3	ENSG00000128284	Tcell	C1	C1.127	protein_coding	apolipoprotein L3 [Source:HGNC Symbol;Acc:HGNC:14868]
CRTAM	ENSG00000109943	Tcell	C1	C1.128	protein_coding	cytotoxic and regulatory T cell molecule [Source:HGNC Symbol;Acc:HGNC:24313]
RRP9	ENSG00000114767	Tcell	C1	C1.129	protein_coding	ribosomal RNA processing 9, U3 small nucleolar RNA binding protein [Source:HGNC Symbol;Acc:HGNC:16829]
DHX58	ENSG00000108771	Tcell	C1	C1.130	protein_coding	DExH-box helicase 58 [Source:HGNC Symbol;Acc:HGNC:29517]
RASA3	ENSG00000280477	Tcell	C1	C1.131	protein_coding	RAS p21 protein activator 3 [Source:HGNC Symbol;Acc:HGNC:20331]
DHRS11	ENSG00000275397	Tcell	C1	C1.132	protein_coding	dehydrogenase/reductase 11 [Source:HGNC Symbol;Acc:HGNC:28639]
KLRG1	ENSG00000139187	Tcell	C1	C1.133	protein_coding	killer cell lectin like receptor G1 [Source:HGNC Symbol;Acc:HGNC:6380]
TGM5	ENSG00000104055	Tcell	C1	C1.134	protein_coding	transglutaminase 5 [Source:HGNC Symbol;Acc:HGNC:11781]
TRIB2	ENSG00000071575	Tcell	C1	C1.135	protein_coding	tribbles pseudokinase 2 [Source:HGNC Symbol;Acc:HGNC:30809]
FAM124B	ENSG00000124019	Tcell	C1	C1.136	protein_coding	family with sequence similarity 124 member B [Source:HGNC Symbol;Acc:HGNC:26224]
FRMD8	ENSG00000126391	Tcell	C1	C1.137	protein_coding	FERM domain containing 8 [Source:HGNC Symbol;Acc:HGNC:25462]
ZBTB10	ENSG00000205189	Tcell	C1	C1.138	protein_coding	zinc finger and BTB domain containing 10 [Source:HGNC Symbol;Acc:HGNC:30953]
CLEC2D	ENSG00000069493	Tcell	C1	C1.139	protein_coding	C-type lectin domain family 2 member D [Source:HGNC Symbol;Acc:HGNC:14351]
CRYBB1	ENSG00000100122	Tcell	C1	C1.140	protein_coding	crystallin beta B1 [Source:HGNC Symbol;Acc:HGNC:2397]
SERGEF	ENSG00000129158	Tcell	C1	C1.141	protein_coding	secretion regulating guanine nucleotide exchange factor [Source:HGNC Symbol;Acc:HGNC:17499]
TNFRSF4	ENSG00000186827	Tcell	C1	C1.142	protein_coding	TNF receptor superfamily member 4 [Source:HGNC Symbol;Acc:HGNC:11918]
CD2	ENSG00000116824	Tcell	C1	C1.143	protein_coding	CD2 molecule [Source:HGNC Symbol;Acc:HGNC:1639]
ITK	ENSG00000113263	Tcell	C1	C1.144	protein_coding	IL2 inducible T cell kinase [Source:HGNC Symbol;Acc:HGNC:6171]
GPR1	ENSG00000283448	Tcell	C1	C1.145	protein_coding	G protein-coupled receptor 1 [Source:HGNC Symbol;Acc:HGNC:4463]
SLC12A8	ENSG00000221955	Tcell	C1	C1.146	protein_coding	solute carrier family 12 member 8 [Source:HGNC Symbol;Acc:HGNC:15595]
LCK	ENSG00000182866	Tcell	C1	C1.147	protein_coding	LCK proto-oncogene, Src family tyrosine kinase [Source:HGNC Symbol;Acc:HGNC:6524]
SKA1	ENSG00000262634	Tcell	C1	C1.148	protein_coding	spindle and kinetochore associated complex subunit 1 [Source:HGNC Symbol;Acc:HGNC:28109]
BRSK2	ENSG00000174672	Tcell	C1	C1.149	protein_coding	BR serine/threonine kinase 2 [Source:HGNC Symbol;Acc:HGNC:11405]
EPHA1	ENSG00000284816	Tcell	C1	C1.150	protein_coding	EPH receptor A1 [Source:HGNC Symbol;Acc:HGNC:3385]
PLCH2	ENSG00000276429	Tcell	C1	C1.151	protein_coding	phospholipase C eta 2 [Source:HGNC Symbol;Acc:HGNC:29037]
EFNA5	ENSG00000184349	Tcell	C1	C1.152	protein_coding	ephrin A5 [Source:HGNC Symbol;Acc:HGNC:3225]
SMPDL3B	ENSG00000130768	Tcell	C1	C1.153	protein_coding	sphingomyelin phosphodiesterase acid like 3B [Source:HGNC Symbol;Acc:HGNC:21416]
IFI44L	ENSG00000137959	Tcell	C1	C1.154	protein_coding	interferon induced protein 44 like [Source:HGNC Symbol;Acc:HGNC:17817]
RPL10L	ENSG00000165496	Tcell	C1	C1.155	protein_coding	ribosomal protein L10 like [Source:HGNC Symbol;Acc:HGNC:17976]
SEC31B	ENSG00000075826	Tcell	C1	C1.156	protein_coding	SEC31 homolog B, COPII coat complex component [Source:HGNC Symbol;Acc:HGNC:23197]
VILL	ENSG00000136059	Tcell	C1	C1.157	protein_coding	villin like [Source:HGNC Symbol;Acc:HGNC:30906]
GSTT1	ENSG00000277656	Tcell	C1	C1.158	protein_coding	glutathione S-transferase theta 1 [Source:HGNC Symbol;Acc:HGNC:4641]
CD6	ENSG00000013725	Tcell	C1	C1.159	protein_coding	CD6 molecule [Source:HGNC Symbol;Acc:HGNC:1691]
GZMK	ENSG00000113088	Tcell	C1	C1.160	protein_coding	granzyme K [Source:HGNC Symbol;Acc:HGNC:4711]
BFSP1	ENSG00000125864	Tcell	C1	C1.161	protein_coding	beaded filament structural protein 1 [Source:HGNC Symbol;Acc:HGNC:1040]
LAT	ENSG00000213658	Tcell	C1	C1.162	protein_coding	linker for activation of T cells [Source:HGNC Symbol;Acc:HGNC:18874]
TRBC1	ENSG00000281981	Tcell	C1	C1.163	TR_C_gene	T cell receptor beta constant 1 [Source:HGNC Symbol;Acc:HGNC:12156]
DPP4	ENSG00000197635	Tcell	C1	C1.164	protein_coding	dipeptidyl peptidase 4 [Source:HGNC Symbol;Acc:HGNC:3009]
FLT3LG	ENSG00000090554	Tcell	C1	C1.165	protein_coding	fms related receptor tyrosine kinase 3 ligand [Source:HGNC Symbol;Acc:HGNC:3766]
GPR171	ENSG00000174946	Tcell	C1	C1.166	protein_coding	G protein-coupled receptor 171 [Source:HGNC Symbol;Acc:HGNC:30057]
SKAP1	ENSG00000141293	Tcell	C1	C1.167	protein_coding	src kinase associated phosphoprotein 1 [Source:HGNC Symbol;Acc:HGNC:15605]
ZNF442	ENSG00000198342	Tcell	C1	C1.168	protein_coding	zinc finger protein 442 [Source:HGNC Symbol;Acc:HGNC:20877]
CD8A	ENSG00000153563	Tcell	C1	C1.169	protein_coding	CD8a molecule [Source:HGNC Symbol;Acc:HGNC:1706]
HESX1	ENSG00000163666	Tcell	C1	C1.170	protein_coding	HESX homeobox 1 [Source:HGNC Symbol;Acc:HGNC:4877]
MAP3K13	ENSG00000073803	Tcell	C1	C1.171	protein_coding	mitogen-activated protein kinase kinase kinase 13 [Source:HGNC Symbol;Acc:HGNC:6852]
CXorf57	ENSG00000147231	Tcell	C1	C1.172	protein-coding gene	MicroRNA protein coding host genes
SEPT8	ENSG00000164402	Tcell	C1	C1.173	protein-coding gene	Septins
CEMP1	ENSG00000205923	Tcell	C1	C1.174	protein_coding	cementum protein 1 [Source:HGNC Symbol;Acc:HGNC:32553]
PDCD1LG2	ENSG00000197646	Tcell	C1	C1.175	protein_coding	programmed cell death 1 ligand 2 [Source:HGNC Symbol;Acc:HGNC:18731]
TNFRSF11A	ENSG00000141655	Tcell	C1	C1.176	protein_coding	TNF receptor superfamily member 11a [Source:HGNC Symbol;Acc:HGNC:11908]
CCL22	ENSG00000102962	Tcell	C1	C1.177	protein_coding	C-C motif chemokine ligand 22 [Source:HGNC Symbol;Acc:HGNC:10621]
MYB	ENSG00000118513	Tcell	C1	C1.178	protein_coding	MYB proto-oncogene, transcription factor [Source:HGNC Symbol;Acc:HGNC:7545]
ABCB9	ENSG00000150967	Tcell	C1	C1.179	protein_coding	ATP binding cassette subfamily B member 9 [Source:HGNC Symbol;Acc:HGNC:50]
HMGB3P30	ENSG00000213652	Tcell	C1	C1.180	processed_pseudogene	high mobility group box 3 pseudogene 30 [Source:HGNC Symbol;Acc:HGNC:39333]
ACAP1	ENSG00000288169	Tcell	C1	C1.181	protein_coding	ArfGAP with coiled-coil, ankyrin repeat and PH domains 1 [Source:HGNC Symbol;Acc:HGNC:16467]
SCN9A	ENSG00000169432	Tcell	C1	C1.182	protein_coding	sodium voltage-gated channel alpha subunit 9 [Source:HGNC Symbol;Acc:HGNC:10597]
TMEM255A	ENSG00000125355	Tcell	C1	C1.183	protein_coding	transmembrane protein 255A [Source:HGNC Symbol;Acc:HGNC:26086]
FRMD4A	ENSG00000151474	Tcell	C1	C1.184	protein_coding	FERM domain containing 4A [Source:HGNC Symbol;Acc:HGNC:25491]
PRG2	ENSG00000186652	Tcell	C1	C1.185	protein_coding	proteoglycan 2, pro eosinophil major basic protein [Source:HGNC Symbol;Acc:HGNC:9362]
PPFIBP1	ENSG00000110841	Tcell	C1	C1.186	protein_coding	PPFIA binding protein 1 [Source:HGNC Symbol;Acc:HGNC:9249]
CMA1	ENSG00000092009	Tcell	C1	C1.187	protein_coding	chymase 1 [Source:HGNC Symbol;Acc:HGNC:2097]
BIRC3	ENSG00000023445	Tcell	C1	C1.188	protein_coding	baculoviral IAP repeat containing 3 [Source:HGNC Symbol;Acc:HGNC:591]
CD80	ENSG00000121594	Tcell	C1	C1.189	protein_coding	CD80 molecule [Source:HGNC Symbol;Acc:HGNC:1700]
ARHGAP22	ENSG00000128805	Tcell	C1	C1.190	protein_coding	Rho GTPase activating protein 22 [Source:HGNC Symbol;Acc:HGNC:30320]
PTPRCAP	ENSG00000213402	Tcell	C1	C1.191	protein_coding	protein tyrosine phosphatase receptor type C associated protein [Source:HGNC Symbol;Acc:HGNC:9667]
ETS1	ENSG00000134954	Tcell	C1	C1.192	protein_coding	ETS proto-oncogene 1, transcription factor [Source:HGNC Symbol;Acc:HGNC:3488]
LTB	ENSG00000223448	Tcell	C1	C1.193	protein_coding	lymphotoxin beta [Source:HGNC Symbol;Acc:HGNC:6711]
KCNG2	ENSG00000178342	Tcell	C1	C1.194	protein_coding	potassium voltage-gated channel modifier subfamily G member 2 [Source:HGNC Symbol;Acc:HGNC:6249]
SLAMF8	ENSG00000158714	Tcell	C1	C1.195	protein_coding	SLAM family member 8 [Source:HGNC Symbol;Acc:HGNC:21391]
FLJ13197	ENSG00000231160	Tcell	C1	C1.196	non-coding RNA	Antisense RNAs
KCNA3	ENSG00000177272	Tcell	C1	C1.197	protein_coding	potassium voltage-gated channel subfamily A member 3 [Source:HGNC Symbol;Acc:HGNC:6221]
MAST1	ENSG00000105613	Tcell	C1	C1.198	protein_coding	microtubule associated serine/threonine kinase 1 [Source:HGNC Symbol;Acc:HGNC:19034]
NR4A3	ENSG00000119508	Tcell	C1	C1.199	protein_coding	nuclear receptor subfamily 4 group A member 3 [Source:HGNC Symbol;Acc:HGNC:7982]
P2RY10	ENSG00000078589	Tcell	C1	C1.200	protein_coding	P2Y receptor family member 10 [Source:HGNC Symbol;Acc:HGNC:19906]
TARDBPP1	ENSG00000233402	Tcell	C1	C1.201	processed_pseudogene	TARDBP pseudogene 1 [Source:HGNC Symbol;Acc:HGNC:16536]
PAQR5	ENSG00000137819	Tcell	C1	C1.202	protein_coding	progestin and adipoQ receptor family member 5 [Source:HGNC Symbol;Acc:HGNC:29645]
ST6GALNAC4	ENSG00000136840	Tcell	C1	C1.203	protein_coding	ST6 N-acetylgalactosaminide alpha-2,6-sialyltransferase 4 [Source:HGNC Symbol;Acc:HGNC:17846]
STXBP6	ENSG00000168952	Tcell	C1	C1.204	protein_coding	syntaxin binding protein 6 [Source:HGNC Symbol;Acc:HGNC:19666]
HOXA1	ENSG00000105991	Tcell	C1	C1.205	protein_coding	homeobox A1 [Source:HGNC Symbol;Acc:HGNC:5099]
EPN2	ENSG00000072134	Tcell	C1	C1.206	protein_coding	epsin 2 [Source:HGNC Symbol;Acc:HGNC:18639]
MAGEA11	ENSG00000185247	Tcell	C1	C1.207	protein_coding	MAGE family member A11 [Source:HGNC Symbol;Acc:HGNC:6798]
NTRK1	ENSG00000198400	Tcell	C1	C1.208	protein_coding	neurotrophic receptor tyrosine kinase 1 [Source:HGNC Symbol;Acc:HGNC:8031]
LOC126987	NA	Tcell	C1	C1.209	Pseudogene	tight junction protein 3 (zona occludens 3)
SPOCK2	ENSG00000107742	Tcell	C1	C1.210	protein_coding	SPARC (osteonectin), cwcv and kazal like domains proteoglycan 2 [Source:HGNC Symbol;Acc:HGNC:13564]
LILRA4	ENSG00000276798	Tcell	C1	C1.211	protein_coding	leukocyte immunoglobulin like receptor A4 [Source:HGNC Symbol;Acc:HGNC:15503]
WNT5B	ENSG00000111186	Tcell	C1	C1.212	protein_coding	Wnt family member 5B [Source:HGNC Symbol;Acc:HGNC:16265]
HIST1H2AE	ENSG00000277075	Tcell	C1	C1.213	protein-coding gene	H2A histones
SIT1	ENSG00000137078	Tcell	C1	C1.214	protein_coding	signaling threshold regulating transmembrane adaptor 1 [Source:HGNC Symbol;Acc:HGNC:17710]
SLC7A10	ENSG00000130876	Tcell	C1	C1.215	protein_coding	solute carrier family 7 member 10 [Source:HGNC Symbol;Acc:HGNC:11058]
CD27	ENSG00000139193	Tcell	C1	C1.216	protein_coding	CD27 molecule [Source:HGNC Symbol;Acc:HGNC:11922]
SLAMF1	ENSG00000117090	Tcell	C1	C1.217	protein_coding	signaling lymphocytic activation molecule family member 1 [Source:HGNC Symbol;Acc:HGNC:10903]
FAM174B	ENSG00000185442	Tcell	C1	C1.218	protein_coding	family with sequence similarity 174 member B [Source:HGNC Symbol;Acc:HGNC:34339]
CCR7	ENSG00000126353	Tcell	C1	C1.219	protein_coding	C-C motif chemokine receptor 7 [Source:HGNC Symbol;Acc:HGNC:1608]
CD70	ENSG00000125726	Tcell	C1	C1.220	protein_coding	CD70 molecule [Source:HGNC Symbol;Acc:HGNC:11937]
CXCR5	ENSG00000160683	Tcell	C1	C1.221	protein_coding	C-X-C motif chemokine receptor 5 [Source:HGNC Symbol;Acc:HGNC:1060]
FZD3	ENSG00000104290	Tcell	C1	C1.222	protein_coding	frizzled class receptor 3 [Source:HGNC Symbol;Acc:HGNC:4041]
HRH1	ENSG00000196639	Tcell	C1	C1.223	protein_coding	histamine receptor H1 [Source:HGNC Symbol;Acc:HGNC:5182]
CCL7	ENSG00000108688	Tcell	C1	C1.224	protein_coding	C-C motif chemokine ligand 7 [Source:HGNC Symbol;Acc:HGNC:10634]
SELL	ENSG00000188404	Tcell	C1	C1.225	protein_coding	selectin L [Source:HGNC Symbol;Acc:HGNC:10720]
GPC4	ENSG00000076716	Tcell	C1	C1.226	protein_coding	glypican 4 [Source:HGNC Symbol;Acc:HGNC:4452]
MS4A2	ENSG00000149534	Tcell	C1	C1.227	protein_coding	membrane spanning 4-domains A2 [Source:HGNC Symbol;Acc:HGNC:7316]
IGHE	ENSG00000276192	Tcell	C1	C1.228	IG_C_gene	immunoglobulin heavy constant epsilon [Source:HGNC Symbol;Acc:HGNC:5522]
IL21	ENSG00000138684	Tcell	C1	C1.229	protein_coding	interleukin 21 [Source:HGNC Symbol;Acc:HGNC:6005]
ATXN8OS	ENSG00000230223	Tcell	C1	C1.230	lncRNA	ATXN8 opposite strand lncRNA [Source:HGNC Symbol;Acc:HGNC:10561]
REN	ENSG00000143839	Tcell	C1	C1.231	protein_coding	renin [Source:HGNC Symbol;Acc:HGNC:9958]
GPR183	ENSG00000169508	Tcell	C1	C1.232	protein_coding	G protein-coupled receptor 183 [Source:HGNC Symbol;Acc:HGNC:3128]
LOC100130100	NA	Tcell	C1	C1.233	Pseudogene	Ig kappa chain V-I region Walker-like
PTGER2	ENSG00000125384	Tcell	C1	C1.234	protein_coding	prostaglandin E receptor 2 [Source:HGNC Symbol;Acc:HGNC:9594]
CD160	ENSG00000117281	Tcell	C1	C1.235	protein_coding	CD160 molecule [Source:HGNC Symbol;Acc:HGNC:17013]
IFNG	ENSG00000111537	Tcell	C1	C1.236	protein_coding	interferon gamma [Source:HGNC Symbol;Acc:HGNC:5438]
LAIR2	ENSG00000274084	Tcell	C1	C1.237	protein_coding	leukocyte associated immunoglobulin like receptor 2 [Source:HGNC Symbol;Acc:HGNC:6478]
CSF2	ENSG00000164400	Tcell	C1	C1.238	protein_coding	colony stimulating factor 2 [Source:HGNC Symbol;Acc:HGNC:2434]
PLEKHF1	ENSG00000166289	Tcell	C1	C1.239	protein_coding	pleckstrin homology and FYVE domain containing 1 [Source:HGNC Symbol;Acc:HGNC:20764]
SOCS1	ENSG00000185338	Tcell	C1	C1.240	protein_coding	suppressor of cytokine signaling 1 [Source:HGNC Symbol;Acc:HGNC:19383]
KLRB1	ENSG00000111796	Tcell	C1	C1.241	protein_coding	killer cell lectin like receptor B1 [Source:HGNC Symbol;Acc:HGNC:6373]
ZNF222	ENSG00000159885	Tcell	C1	C1.242	protein_coding	zinc finger protein 222 [Source:HGNC Symbol;Acc:HGNC:13015]
CCL23	ENSG00000276114	Tcell	C1	C1.243	protein_coding	C-C motif chemokine ligand 23 [Source:HGNC Symbol;Acc:HGNC:10622]
GPR65	ENSG00000140030	Tcell	C1	C1.244	protein_coding	G protein-coupled receptor 65 [Source:HGNC Symbol;Acc:HGNC:4517]
LAMP3	ENSG00000078081	Tcell	C1	C1.245	protein_coding	lysosomal associated membrane protein 3 [Source:HGNC Symbol;Acc:HGNC:14582]
RSAD2	ENSG00000134321	Tcell	C1	C1.246	protein_coding	radical S-adenosyl methionine domain containing 2 [Source:HGNC Symbol;Acc:HGNC:30908]
CCL1	ENSG00000108702	Tcell	C1	C1.247	protein_coding	C-C motif chemokine ligand 1 [Source:HGNC Symbol;Acc:HGNC:10609]
TEC	ENSG00000135605	Tcell	C1	C1.248	protein_coding	tec protein tyrosine kinase [Source:HGNC Symbol;Acc:HGNC:11719]
CDC25A	ENSG00000164045	Tcell	C1	C1.249	protein_coding	cell division cycle 25A [Source:HGNC Symbol;Acc:HGNC:1725]
PVRIG	ENSG00000213413	Tcell	C1	C1.250	protein_coding	PVR related immunoglobulin domain containing [Source:HGNC Symbol;Acc:HGNC:32190]
LTC4S	ENSG00000283887	Tcell	C1	C1.251	protein_coding	leukotriene C4 synthase [Source:HGNC Symbol;Acc:HGNC:6719]
SAMSN1	ENSG00000155307	Tcell	C1	C1.252	protein_coding	SAM domain, SH3 domain and nuclear localization signals 1 [Source:HGNC Symbol;Acc:HGNC:10528]
MANEA	ENSG00000172469	Tcell	C1	C1.253	protein_coding	mannosidase endo-alpha [Source:HGNC Symbol;Acc:HGNC:21072]
CCR5	ENSG00000160791	Tcell	C1	C1.254	protein_coding	C-C motif chemokine receptor 5 [Source:HGNC Symbol;Acc:HGNC:1606]
EGR2	ENSG00000122877	Tcell	C1	C1.255	protein_coding	early growth response 2 [Source:HGNC Symbol;Acc:HGNC:3239]
CCL18	ENSG00000278006	Tcell	C1	C1.256	protein_coding	C-C motif chemokine ligand 18 [Source:HGNC Symbol;Acc:HGNC:10616]
CRISP3	ENSG00000096006	Tcell	C1	C1.257	protein_coding	cysteine rich secretory protein 3 [Source:HGNC Symbol;Acc:HGNC:16904]
DEPDC5	ENSG00000100150	Tcell	C1	C1.258	protein_coding	DEP domain containing 5, GATOR1 subcomplex subunit [Source:HGNC Symbol;Acc:HGNC:18423]
PDE6C	ENSG00000095464	Tcell	C1	C1.259	protein_coding	phosphodiesterase 6C [Source:HGNC Symbol;Acc:HGNC:8787]
HIC1	ENSG00000177374	Tcell	C1	C1.260	protein_coding	HIC ZBTB transcriptional repressor 1 [Source:HGNC Symbol;Acc:HGNC:4909]
ZAP70	ENSG00000115085	Tcell	C1	C1.261	protein_coding	zeta chain of T cell receptor associated protein kinase 70 [Source:HGNC Symbol;Acc:HGNC:12858]
GFI1	ENSG00000162676	Tcell	C1	C1.262	protein_coding	growth factor independent 1 transcriptional repressor [Source:HGNC Symbol;Acc:HGNC:4237]
CD96	ENSG00000153283	Tcell	C1	C1.263	protein_coding	CD96 molecule [Source:HGNC Symbol;Acc:HGNC:16892]
GRAP2	ENSG00000100351	Tcell	C1	C1.264	protein_coding	GRB2 related adaptor protein 2 [Source:HGNC Symbol;Acc:HGNC:4563]
ALOX5	ENSG00000275565	Tcell	C1	C1.265	protein_coding	arachidonate 5-lipoxygenase [Source:HGNC Symbol;Acc:HGNC:435]
C3AR1	ENSG00000171860	Tcell	C1	C1.266	protein_coding	complement C3a receptor 1 [Source:HGNC Symbol;Acc:HGNC:1319]
CD1B	ENSG00000158485	Bcell	C2	C2.001	protein_coding	CD1b molecule [Source:HGNC Symbol;Acc:HGNC:1635]
GNG7	ENSG00000176533	Bcell	C2	C2.002	protein_coding	G protein subunit gamma 7 [Source:HGNC Symbol;Acc:HGNC:4410]
FRK	ENSG00000111816	Bcell	C2	C2.003	protein_coding	fyn related Src family tyrosine kinase [Source:HGNC Symbol;Acc:HGNC:3955]
BRAF	ENSG00000157764	Bcell	C2	C2.004	protein_coding	B-Raf proto-oncogene, serine/threonine kinase [Source:HGNC Symbol;Acc:HGNC:1097]
NIPSNAP3B	ENSG00000165028	Bcell	C2	C2.005	protein_coding	nipsnap homolog 3B [Source:HGNC Symbol;Acc:HGNC:23641]
NMBR	ENSG00000135577	Bcell	C2	C2.006	protein_coding	neuromedin B receptor [Source:HGNC Symbol;Acc:HGNC:7843]
PSG2	ENSG00000242221	Bcell	C2	C2.007	protein_coding	pregnancy specific beta-1-glycoprotein 2 [Source:HGNC Symbol;Acc:HGNC:9519]
DENND5B	ENSG00000170456	Bcell	C2	C2.008	protein_coding	DENN domain containing 5B [Source:HGNC Symbol;Acc:HGNC:28338]
IL7	ENSG00000104432	Bcell	C2	C2.009	protein_coding	interleukin 7 [Source:HGNC Symbol;Acc:HGNC:6023]
CR2	ENSG00000117322	Bcell	C2	C2.010	protein_coding	complement C3d receptor 2 [Source:HGNC Symbol;Acc:HGNC:2336]
TNFRSF17	ENSG00000048462	Bcell	C2	C2.011	protein_coding	TNF receptor superfamily member 17 [Source:HGNC Symbol;Acc:HGNC:11913]
BCL7A	ENSG00000282873	Bcell	C2	C2.012	protein_coding	BAF chromatin remodeling complex subunit BCL7A [Source:HGNC Symbol;Acc:HGNC:1004]
MEP1A	ENSG00000112818	Bcell	C2	C2.013	protein_coding	meprin A subunit alpha [Source:HGNC Symbol;Acc:HGNC:7015]
CD40	ENSG00000101017	Bcell	C2	C2.014	protein_coding	CD40 molecule [Source:HGNC Symbol;Acc:HGNC:11919]
P2RX5	ENSG00000083454	Bcell	C2	C2.015	protein_coding	purinergic receptor P2X 5 [Source:HGNC Symbol;Acc:HGNC:8536]
DACH1	ENSG00000276644	Bcell	C2	C2.016	protein_coding	dachshund family transcription factor 1 [Source:HGNC Symbol;Acc:HGNC:2663]
LY86	ENSG00000112799	Bcell	C2	C2.017	protein_coding	lymphocyte antigen 86 [Source:HGNC Symbol;Acc:HGNC:16837]
HHEX	ENSG00000152804	Bcell	C2	C2.018	protein_coding	hematopoietically expressed homeobox [Source:HGNC Symbol;Acc:HGNC:4901]
CD180	ENSG00000134061	Bcell	C2	C2.019	protein_coding	CD180 molecule [Source:HGNC Symbol;Acc:HGNC:6726]
CD1C	ENSG00000158481	Bcell	C2	C2.020	protein_coding	CD1c molecule [Source:HGNC Symbol;Acc:HGNC:1636]
STAP1	ENSG00000035720	Bcell	C2	C2.021	protein_coding	signal transducing adaptor family member 1 [Source:HGNC Symbol;Acc:HGNC:24133]
EAF2	ENSG00000145088	Bcell	C2	C2.022	protein_coding	ELL associated factor 2 [Source:HGNC Symbol;Acc:HGNC:23115]
CD79B	ENSG00000007312	Bcell	C2	C2.023	protein_coding	CD79b molecule [Source:HGNC Symbol;Acc:HGNC:1699]
RASGRP3	ENSG00000152689	Bcell	C2	C2.024	protein_coding	RAS guanyl releasing protein 3 [Source:HGNC Symbol;Acc:HGNC:14545]
VPREB3	ENSG00000128218	Bcell	C2	C2.025	protein_coding	V-set pre-B cell surrogate light chain 3 [Source:HGNC Symbol;Acc:HGNC:12710]
IRF8	ENSG00000140968	Bcell	C2	C2.026	protein_coding	interferon regulatory factor 8 [Source:HGNC Symbol;Acc:HGNC:5358]
FCGR2B	ENSG00000072694	Bcell	C2	C2.027	protein_coding	Fc fragment of IgG receptor IIb [Source:HGNC Symbol;Acc:HGNC:3618]
KIAA0226L	ENSG00000102445	Bcell	C2	C2.028	protein-coding gene	PIK3C3 complex subunits
IGHM	ENSG00000282657	Bcell	C2	C2.029	IG_C_gene	immunoglobulin heavy constant mu [Source:HGNC Symbol;Acc:HGNC:5541]
IGKC	ENSG00000211592	Bcell	C2	C2.030	IG_C_gene	immunoglobulin kappa constant [Source:HGNC Symbol;Acc:HGNC:5716]
GUSBP11	ENSG00000228315	Bcell	C2	C2.031	lncRNA	GUSB pseudogene 11 [Source:HGNC Symbol;Acc:HGNC:42325]
RALGPS2	ENSG00000116191	Bcell	C2	C2.032	protein_coding	Ral GEF with PH domain and SH3 binding motif 2 [Source:HGNC Symbol;Acc:HGNC:30279]
CD72	ENSG00000137101	Bcell	C2	C2.033	protein_coding	CD72 molecule [Source:HGNC Symbol;Acc:HGNC:1696]
FCER2	ENSG00000104921	Bcell	C2	C2.034	protein_coding	Fc fragment of IgE receptor II [Source:HGNC Symbol;Acc:HGNC:3612]
CD22	ENSG00000012124	Bcell	C2	C2.035	protein_coding	CD22 molecule [Source:HGNC Symbol;Acc:HGNC:1643]
CD79A	ENSG00000105369	Bcell	C2	C2.036	protein_coding	CD79a molecule [Source:HGNC Symbol;Acc:HGNC:1698]
ABCB4	ENSG00000005471	Bcell	C2	C2.037	protein_coding	ATP binding cassette subfamily B member 4 [Source:HGNC Symbol;Acc:HGNC:45]
BLK	ENSG00000136573	Bcell	C2	C2.038	protein_coding	BLK proto-oncogene, Src family tyrosine kinase [Source:HGNC Symbol;Acc:HGNC:1057]
CD19	ENSG00000177455	Bcell	C2	C2.039	protein_coding	CD19 molecule [Source:HGNC Symbol;Acc:HGNC:1633]
IGLL3P	ENSG00000206066	Bcell	C2	C2.040	unprocessed_pseudogene	immunoglobulin lambda like polypeptide 3, pseudogene [Source:HGNC Symbol;Acc:HGNC:5872]
ADAM28	ENSG00000042980	Bcell	C2	C2.041	protein_coding	ADAM metallopeptidase domain 28 [Source:HGNC Symbol;Acc:HGNC:206]
BANK1	ENSG00000153064	Bcell	C2	C2.042	protein_coding	B cell scaffold protein with ankyrin repeats 1 [Source:HGNC Symbol;Acc:HGNC:18233]
IGHD	ENSG00000278801	Bcell	C2	C2.043	IG_C_gene	immunoglobulin heavy constant delta [Source:HGNC Symbol;Acc:HGNC:5480]
HLA-DOB	ENSG00000243612	Bcell	C2	C2.044	protein_coding	major histocompatibility complex, class II, DO beta [Source:HGNC Symbol;Acc:HGNC:4937]
PNOC	ENSG00000168081	Bcell	C2	C2.045	protein_coding	prepronociceptin [Source:HGNC Symbol;Acc:HGNC:9163]
SPIB	ENSG00000269404	Bcell	C2	C2.046	protein_coding	Spi-B transcription factor [Source:HGNC Symbol;Acc:HGNC:11242]
MS4A1	ENSG00000156738	Bcell	C2	C2.047	protein_coding	membrane spanning 4-domains A1 [Source:HGNC Symbol;Acc:HGNC:7315]
FCRL2	ENSG00000132704	Bcell	C2	C2.048	protein_coding	Fc receptor like 2 [Source:HGNC Symbol;Acc:HGNC:14875]
TCL1A	ENSG00000100721	Bcell	C2	C2.049	protein_coding	TCL1 family AKT coactivator A [Source:HGNC Symbol;Acc:HGNC:11648]
ZNF286A	ENSG00000187607	Bcell	C2	C2.050	protein_coding	zinc finger protein 286A [Source:HGNC Symbol;Acc:HGNC:13501]
CPA3	ENSG00000163751	Bcell	C2	C2.051	protein_coding	carboxypeptidase A3 [Source:HGNC Symbol;Acc:HGNC:2298]
FES	ENSG00000182511	Bcell	C2	C2.052	protein_coding	FES proto-oncogene, tyrosine kinase [Source:HGNC Symbol;Acc:HGNC:3657]
LRMP	ENSG00000118308	Bcell	C2	C2.053	protein-coding gene
LINC00921	ENSG00000281005	Bcell	C2	C2.054	lncRNA	long intergenic non-protein coding RNA 921 [Source:HGNC Symbol;Acc:HGNC:26830]
TPSAB1	ENSG00000172236	Bcell	C2	C2.055	protein_coding	tryptase alpha/beta 1 [Source:HGNC Symbol;Acc:HGNC:12019]
AIM2	ENSG00000163568	Bcell	C2	C2.056	protein_coding	absent in melanoma 2 [Source:HGNC Symbol;Acc:HGNC:357]
AMPD1	ENSG00000116748	Bcell	C2	C2.057	protein_coding	adenosine monophosphate deaminase 1 [Source:HGNC Symbol;Acc:HGNC:468]
UGT1A8	ENSG00000242366	Bcell	C2	C2.058	protein_coding	UDP glucuronosyltransferase family 1 member A8 [Source:HGNC Symbol;Acc:HGNC:12540]
ADAMDEC1	ENSG00000134028	Bcell	C2	C2.059	protein_coding	ADAM like decysin 1 [Source:HGNC Symbol;Acc:HGNC:16299]
LHCGR	ENSG00000138039	Bcell	C2	C2.060	protein_coding	luteinizing hormone/choriogonadotropin receptor [Source:HGNC Symbol;Acc:HGNC:6585]
NPIPB15	ENSG00000196436	Bcell	C2	C2.061	protein_coding	nuclear pore complex interacting protein family member B15 [Source:HGNC Symbol;Acc:HGNC:34409]
CD37	ENSG00000104894	Bcell	C2	C2.062	protein_coding	CD37 molecule [Source:HGNC Symbol;Acc:HGNC:1666]
CYP27B1	ENSG00000111012	Bcell	C2	C2.063	protein_coding	cytochrome P450 family 27 subfamily B member 1 [Source:HGNC Symbol;Acc:HGNC:2606]
IFNA10	ENSG00000186803	Bcell	C2	C2.064	protein_coding	interferon alpha 10 [Source:HGNC Symbol;Acc:HGNC:5418]
RASGRP2	ENSG00000068831	Bcell	C2	C2.065	protein_coding	RAS guanyl releasing protein 2 [Source:HGNC Symbol;Acc:HGNC:9879]
UGT2B17	ENSG00000197888	Bcell	C2	C2.066	protein_coding	UDP glucuronosyltransferase family 2 member B17 [Source:HGNC Symbol;Acc:HGNC:12547]
BHLHE41	ENSG00000123095	Bcell	C2	C2.067	protein_coding	basic helix-loop-helix family member e41 [Source:HGNC Symbol;Acc:HGNC:16617]
HLA-DQA1	ENSG00000236418	Bcell	C2	C2.068	protein_coding	major histocompatibility complex, class II, DQ alpha 1 [Source:HGNC Symbol;Acc:HGNC:4942]
IL4R	ENSG00000077238	Bcell	C2	C2.069	protein_coding	interleukin 4 receptor [Source:HGNC Symbol;Acc:HGNC:6015]
MMP12	ENSG00000262406	Bcell	C2	C2.070	protein_coding	matrix metallopeptidase 12 [Source:HGNC Symbol;Acc:HGNC:7158]
TNFRSF13B	ENSG00000240505	Bcell	C2	C2.071	protein_coding	TNF receptor superfamily member 13B [Source:HGNC Symbol;Acc:HGNC:18153]
SIK1	ENSG00000142178	Bcell	C2	C2.072	protein_coding	salt inducible kinase 1 [Source:HGNC Symbol;Acc:HGNC:11142]
CD1A	ENSG00000158477	Bcell	C2	C2.073	protein_coding	CD1a molecule [Source:HGNC Symbol;Acc:HGNC:1634]
BEND5	ENSG00000162373	Bcell	C2	C2.074	protein_coding	BEN domain containing 5 [Source:HGNC Symbol;Acc:HGNC:25668]
SLC12A1	ENSG00000074803	Bcell	C2	C2.075	protein_coding	solute carrier family 12 member 1 [Source:HGNC Symbol;Acc:HGNC:10910]
BACH2	ENSG00000112182	Bcell	C2	C2.076	protein_coding	BTB domain and CNC homolog 2 [Source:HGNC Symbol;Acc:HGNC:14078]
MICAL3	ENSG00000243156	Bcell	C2	C2.077	protein_coding	microtubule associated monooxygenase, calponin and LIM domain containing 3 [Source:HGNC Symbol;Acc:HGNC:24694]
MARCH3	ENSG00000173926	Bcell	C2	C2.078	protein-coding gene	Ring finger proteins|Membrane associated ring-CH-type fingers
TRAF4	ENSG00000076604	Bcell	C2	C2.079	protein_coding	TNF receptor associated factor 4 [Source:HGNC Symbol;Acc:HGNC:12034]
C11orf80	ENSG00000173715	Bcell	C2	C2.080	protein_coding	chromosome 11 open reading frame 80 [Source:HGNC Symbol;Acc:HGNC:26197]
SP140	ENSG00000079263	Bcell	C2	C2.081	protein_coding	SP140 nuclear body protein [Source:HGNC Symbol;Acc:HGNC:17133]
FAM65B	ENSG00000111913	Bcell	C2	C2.082	protein-coding gene	Armadillo like helical domain containing
PTPRG	ENSG00000144724	Bcell	C2	C2.083	protein_coding	protein tyrosine phosphatase receptor type G [Source:HGNC Symbol;Acc:HGNC:9671]
BMP2K	ENSG00000138756	Bcell	C2	C2.084	protein_coding	BMP2 inducible kinase [Source:HGNC Symbol;Acc:HGNC:18041]
IL5RA	ENSG00000091181	Bcell	C2	C2.085	protein_coding	interleukin 5 receptor subunit alpha [Source:HGNC Symbol;Acc:HGNC:6017]
CXCL9	ENSG00000138755	Bcell	C2	C2.086	protein_coding	C-X-C motif chemokine ligand 9 [Source:HGNC Symbol;Acc:HGNC:7098]
GPR18	ENSG00000125245	Bcell	C2	C2.087	protein_coding	G protein-coupled receptor 18 [Source:HGNC Symbol;Acc:HGNC:4472]
RGS13	ENSG00000127074	Bcell	C2	C2.088	protein_coding	regulator of G protein signaling 13 [Source:HGNC Symbol;Acc:HGNC:9995]
CCL13	ENSG00000181374	Bcell	C2	C2.089	protein_coding	C-C motif chemokine ligand 13 [Source:HGNC Symbol;Acc:HGNC:10611]
TMEM156	ENSG00000121895	Bcell	C2	C2.090	protein_coding	transmembrane protein 156 [Source:HGNC Symbol;Acc:HGNC:26260]
MBL2	ENSG00000165471	Bcell	C2	C2.091	protein_coding	mannose binding lectin 2 [Source:HGNC Symbol;Acc:HGNC:6922]
CLCA3P	ENSG00000153923	Bcell	C2	C2.092	transcribed_unprocessed_pseudogene	chloride channel accessory 3, pseudogene [Source:HGNC Symbol;Acc:HGNC:2017]
CXCL5	ENSG00000163735	Bcell	C2	C2.093	protein_coding	C-X-C motif chemokine ligand 5 [Source:HGNC Symbol;Acc:HGNC:10642]
CCL8	ENSG00000108700	Bcell	C2	C2.094	protein_coding	C-C motif chemokine ligand 8 [Source:HGNC Symbol;Acc:HGNC:10635]
ACP5	ENSG00000102575	Bcell	C2	C2.095	protein_coding	acid phosphatase 5, tartrate resistant [Source:HGNC Symbol;Acc:HGNC:124]
FAIM3	ENSG00000162894	Bcell	C2	C2.096	protein-coding gene	Immunoglobulin like domain containing
MZB1	ENSG00000170476	Bcell	C2	C2.097	protein_coding	marginal zone B and B1 cell specific protein [Source:HGNC Symbol;Acc:HGNC:30125]
SIGLEC1	ENSG00000088827	Bcell	C2	C2.098	protein_coding	sialic acid binding Ig like lectin 1 [Source:HGNC Symbol;Acc:HGNC:11127]
ADAMTS3	ENSG00000156140	Bcell	C2	C2.099	protein_coding	ADAM metallopeptidase with thrombospondin type 1 motif 3 [Source:HGNC Symbol;Acc:HGNC:219]
FPR3	ENSG00000187474	Bcell	C2	C2.100	protein_coding	formyl peptide receptor 3 [Source:HGNC Symbol;Acc:HGNC:3828]
PAX7	ENSG00000009709	Bcell	C2	C2.101	protein_coding	paired box 7 [Source:HGNC Symbol;Acc:HGNC:8621]
CCR6	ENSG00000112486	Bcell	C2	C2.102	protein_coding	C-C motif chemokine receptor 6 [Source:HGNC Symbol;Acc:HGNC:1607]
ZBTB32	ENSG00000011590	Bcell	C2	C2.103	protein_coding	zinc finger and BTB domain containing 32 [Source:HGNC Symbol;Acc:HGNC:16763]
HPGDS	ENSG00000163106	Bcell	C2	C2.104	protein_coding	hematopoietic prostaglandin D synthase [Source:HGNC Symbol;Acc:HGNC:17890]
IL12B	ENSG00000113302	Bcell	C2	C2.105	protein_coding	interleukin 12B [Source:HGNC Symbol;Acc:HGNC:5970]
IL1A	ENSG00000115008	Bcell	C2	C2.106	protein_coding	interleukin 1 alpha [Source:HGNC Symbol;Acc:HGNC:5991]
SLCO5A1	ENSG00000137571	Bcell	C2	C2.107	protein_coding	solute carrier organic anion transporter family member 5A1 [Source:HGNC Symbol;Acc:HGNC:19046]
CD69	ENSG00000110848	Bcell	C2	C2.108	protein_coding	CD69 molecule [Source:HGNC Symbol;Acc:HGNC:1694]
GYPE	ENSG00000197465	Bcell	C2	C2.109	protein_coding	glycophorin E (MNS blood group) [Source:HGNC Symbol;Acc:HGNC:4705]
CTSG	ENSG00000100448	Bcell	C2	C2.110	protein_coding	cathepsin G [Source:HGNC Symbol;Acc:HGNC:2532]
IL1RL1	ENSG00000115602	Bcell	C2	C2.111	protein_coding	interleukin 1 receptor like 1 [Source:HGNC Symbol;Acc:HGNC:5998]
CFP	ENSG00000126759	NK	C3	C3.001	protein_coding	complement factor properdin [Source:HGNC Symbol;Acc:HGNC:8864]
NLRP3	ENSG00000162711	NK	C3	C3.002	protein_coding	NLR family pyrin domain containing 3 [Source:HGNC Symbol;Acc:HGNC:16400]
S100A12	ENSG00000163221	NK	C3	C3.003	protein_coding	S100 calcium binding protein A12 [Source:HGNC Symbol;Acc:HGNC:10489]
AIF1	ENSG00000235588	NK	C3	C3.004	protein_coding	allograft inflammatory factor 1 [Source:HGNC Symbol;Acc:HGNC:352]
CLEC7A	ENSG00000172243	NK	C3	C3.005	protein_coding	C-type lectin domain containing 7A [Source:HGNC Symbol;Acc:HGNC:14558]
HK3	ENSG00000160883	NK	C3	C3.006	protein_coding	hexokinase 3 [Source:HGNC Symbol;Acc:HGNC:4925]
NOD2	ENSG00000167207	NK	C3	C3.007	protein_coding	nucleotide binding oligomerization domain containing 2 [Source:HGNC Symbol;Acc:HGNC:5331]
BST1	ENSG00000109743	NK	C3	C3.008	protein_coding	bone marrow stromal cell antigen 1 [Source:HGNC Symbol;Acc:HGNC:1118]
PADI4	ENSG00000280908	NK	C3	C3.009	protein_coding	peptidyl arginine deiminase 4 [Source:HGNC Symbol;Acc:HGNC:18368]
CLEC4A	ENSG00000111729	NK	C3	C3.010	protein_coding	C-type lectin domain family 4 member A [Source:HGNC Symbol;Acc:HGNC:13257]
HCK	ENSG00000101336	NK	C3	C3.011	protein_coding	HCK proto-oncogene, Src family tyrosine kinase [Source:HGNC Symbol;Acc:HGNC:4840]
TLR8	ENSG00000101916	NK	C3	C3.012	protein_coding	toll like receptor 8 [Source:HGNC Symbol;Acc:HGNC:15632]
SLC15A3	ENSG00000110446	NK	C3	C3.013	protein_coding	solute carrier family 15 member 3 [Source:HGNC Symbol;Acc:HGNC:18068]
LILRB2	ENSG00000274513	NK	C3	C3.014	protein_coding	leukocyte immunoglobulin like receptor B2 [Source:HGNC Symbol;Acc:HGNC:6606]
VNN1	ENSG00000112299	NK	C3	C3.015	protein_coding	vanin 1 [Source:HGNC Symbol;Acc:HGNC:12705]
CHST15	ENSG00000182022	NK	C3	C3.016	protein_coding	carbohydrate sulfotransferase 15 [Source:HGNC Symbol;Acc:HGNC:18137]
ST3GAL6	ENSG00000064225	NK	C3	C3.017	protein_coding	ST3 beta-galactoside alpha-2,3-sialyltransferase 6 [Source:HGNC Symbol;Acc:HGNC:18080]
TLR2	ENSG00000137462	NK	C3	C3.018	protein_coding	toll like receptor 2 [Source:HGNC Symbol;Acc:HGNC:11848]
LILRA2	ENSG00000274000	NK	C3	C3.019	protein_coding	leukocyte immunoglobulin like receptor A2 [Source:HGNC Symbol;Acc:HGNC:6603]
NCF2	ENSG00000116701	NK	C3	C3.020	protein_coding	neutrophil cytosolic factor 2 [Source:HGNC Symbol;Acc:HGNC:7661]
LST1	ENSG00000235915	NK	C3	C3.021	protein_coding	leukocyte specific transcript 1 [Source:HGNC Symbol;Acc:HGNC:14189]
P2RY13	ENSG00000181631	NK	C3	C3.022	protein_coding	purinergic receptor P2Y13 [Source:HGNC Symbol;Acc:HGNC:4537]
IGSF6	ENSG00000283934	NK	C3	C3.023	protein_coding	immunoglobulin superfamily member 6 [Source:HGNC Symbol;Acc:HGNC:5953]
MEFV	ENSG00000103313	NK	C3	C3.024	protein_coding	MEFV innate immuity regulator, pyrin [Source:HGNC Symbol;Acc:HGNC:6998]
QPCT	ENSG00000115828	NK	C3	C3.025	protein_coding	glutaminyl-peptide cyclotransferase [Source:HGNC Symbol;Acc:HGNC:9753]
MNDA	ENSG00000163563	NK	C3	C3.026	protein_coding	myeloid cell nuclear differentiation antigen [Source:HGNC Symbol;Acc:HGNC:7183]
NFE2	ENSG00000123405	NK	C3	C3.027	protein_coding	nuclear factor, erythroid 2 [Source:HGNC Symbol;Acc:HGNC:7780]
CD300A	ENSG00000167851	NK	C3	C3.028	protein_coding	CD300a molecule [Source:HGNC Symbol;Acc:HGNC:19319]
IL18RAP	ENSG00000115607	NK	C3	C3.029	protein_coding	interleukin 18 receptor accessory protein [Source:HGNC Symbol;Acc:HGNC:5989]
TNFSF14	ENSG00000125735	NK	C3	C3.030	protein_coding	TNF superfamily member 14 [Source:HGNC Symbol;Acc:HGNC:11930]
BPI	ENSG00000101425	NK	C3	C3.031	protein_coding	bactericidal permeability increasing protein [Source:HGNC Symbol;Acc:HGNC:1095]
KIR2DL1	ENSG00000276820	NK	C3	C3.032	protein_coding	killer cell immunoglobulin like receptor, two Ig domains and long cytoplasmic tail 1 [Source:HGNC Symbol;Acc:HGNC:6329]
S1PR5	ENSG00000180739	NK	C3	C3.033	protein_coding	sphingosine-1-phosphate receptor 5 [Source:HGNC Symbol;Acc:HGNC:14299]
ATP8B4	ENSG00000104043	NK	C3	C3.034	protein_coding	ATPase phospholipid transporting 8B4 (putative) [Source:HGNC Symbol;Acc:HGNC:13536]
NME8	ENSG00000086288	NK	C3	C3.035	protein_coding	NME/NM23 family member 8 [Source:HGNC Symbol;Acc:HGNC:16473]
ELANE	ENSG00000277571	NK	C3	C3.036	protein_coding	elastase, neutrophil expressed [Source:HGNC Symbol;Acc:HGNC:3309]
KIR3DL2	ENSG00000273735	NK	C3	C3.037	protein_coding	killer cell immunoglobulin like receptor, three Ig domains and long cytoplasmic tail 2 [Source:HGNC Symbol;Acc:HGNC:6339]
KIR2DL4	ENSG00000276779	NK	C3	C3.038	protein_coding	killer cell immunoglobulin like receptor, two Ig domains and long cytoplasmic tail 4 [Source:HGNC Symbol;Acc:HGNC:6332]
KIR2DS4	ENSG00000274324	NK	C3	C3.039	polymorphic_pseudogene	killer cell immunoglobulin like receptor, two Ig domains and short cytoplasmic tail 4 [Source:HGNC Symbol;Acc:HGNC:6336]
CEACAM8	ENSG00000124469	NK	C3	C3.040	protein_coding	CEA cell adhesion molecule 8 [Source:HGNC Symbol;Acc:HGNC:1820]
MS4A3	ENSG00000149516	NK	C3	C3.041	protein_coding	membrane spanning 4-domains A3 [Source:HGNC Symbol;Acc:HGNC:7317]
AZU1	ENSG00000278624	NK	C3	C3.042	protein_coding	azurocidin 1 [Source:HGNC Symbol;Acc:HGNC:913]
APOL6	ENSG00000221963	NK	C3	C3.043	protein_coding	apolipoprotein L6 [Source:HGNC Symbol;Acc:HGNC:14870]
KLRF1	ENSG00000150045	NK	C3	C3.044	protein_coding	killer cell lectin like receptor F1 [Source:HGNC Symbol;Acc:HGNC:13342]
PTGDR	ENSG00000168229	NK	C3	C3.045	protein_coding	prostaglandin D2 receptor [Source:HGNC Symbol;Acc:HGNC:9591]
GNLY	ENSG00000115523	NK	C3	C3.046	protein_coding	granulysin [Source:HGNC Symbol;Acc:HGNC:4414]
TTC38	ENSG00000075234	NK	C3	C3.047	protein_coding	tetratricopeptide repeat domain 38 [Source:HGNC Symbol;Acc:HGNC:26082]
CCL4	ENSG00000277943	NK	C3	C3.048	protein_coding	C-C motif chemokine ligand 4 [Source:HGNC Symbol;Acc:HGNC:10630]
KLRD1	ENSG00000134539	NK	C3	C3.049	protein_coding	killer cell lectin like receptor D1 [Source:HGNC Symbol;Acc:HGNC:6378]
DEFA4	ENSG00000285318	NK	C3	C3.050	protein_coding	defensin alpha 4 [Source:HGNC Symbol;Acc:HGNC:2763]
FASLG	ENSG00000117560	NK	C3	C3.051	protein_coding	Fas ligand [Source:HGNC Symbol;Acc:HGNC:11936]
CD38	ENSG00000004468	NK	C3	C3.052	protein_coding	CD38 molecule [Source:HGNC Symbol;Acc:HGNC:1667]
KLRC4	ENSG00000183542	NK	C3	C3.053	protein_coding	killer cell lectin like receptor C4 [Source:HGNC Symbol;Acc:HGNC:6377]
CCL19	ENSG00000172724	NK	C3	C3.054	protein_coding	C-C motif chemokine ligand 19 [Source:HGNC Symbol;Acc:HGNC:10617]
HDC	ENSG00000140287	NK	C3	C3.055	protein_coding	histidine decarboxylase [Source:HGNC Symbol;Acc:HGNC:4855]
CXCL11	ENSG00000169248	NK	C3	C3.056	protein_coding	C-X-C motif chemokine ligand 11 [Source:HGNC Symbol;Acc:HGNC:10638]
CXCL10	ENSG00000169245	NK	C3	C3.057	protein_coding	C-X-C motif chemokine ligand 10 [Source:HGNC Symbol;Acc:HGNC:10637]
ZNF135	ENSG00000176293	NK	C3	C3.058	protein_coding	zinc finger protein 135 [Source:HGNC Symbol;Acc:HGNC:12919]
IDO1	ENSG00000131203	NK	C3	C3.059	protein_coding	indoleamine 2,3-dioxygenase 1 [Source:HGNC Symbol;Acc:HGNC:6059]
APOBEC3G	ENSG00000239713	NK	C3	C3.060	protein_coding	apolipoprotein B mRNA editing enzyme catalytic subunit 3G [Source:HGNC Symbol;Acc:HGNC:17357]
TXK	ENSG00000074966	NK	C3	C3.061	protein_coding	TXK tyrosine kinase [Source:HGNC Symbol;Acc:HGNC:12434]
CCND2	ENSG00000118971	NK	C3	C3.062	protein_coding	cyclin D2 [Source:HGNC Symbol;Acc:HGNC:1583]
LINC00597	NA	NK	C3	C3.063	lncRNA	long intergenic non-protein coding RNA 597
TEP1	ENSG00000129566	NK	C3	C3.064	protein_coding	telomerase associated protein 1 [Source:HGNC Symbol;Acc:HGNC:11726]
KIAA0754	ENSG00000127603	NK	C3	C3.065	protein-coding gene	Plakins|EF-hand domain containing
CST7	ENSG00000077984	NK	C3	C3.066	protein_coding	cystatin F [Source:HGNC Symbol;Acc:HGNC:2479]
ADRB2	ENSG00000169252	NK	C3	C3.067	protein_coding	adrenoceptor beta 2 [Source:HGNC Symbol;Acc:HGNC:286]
KLRK1	ENSG00000213809	NK	C3	C3.068	protein_coding	killer cell lectin like receptor K1 [Source:HGNC Symbol;Acc:HGNC:18788]
GZMM	ENSG00000197540	NK	C3	C3.069	protein_coding	granzyme M [Source:HGNC Symbol;Acc:HGNC:4712]
GZMH	ENSG00000100450	NK	C3	C3.070	protein_coding	granzyme H [Source:HGNC Symbol;Acc:HGNC:4710]
TRDC	ENSG00000211829	NK	C3	C3.071	TR_C_gene	T cell receptor delta constant [Source:HGNC Symbol;Acc:HGNC:12253]
IL18R1	ENSG00000115604	NK	C3	C3.072	protein_coding	interleukin 18 receptor 1 [Source:HGNC Symbol;Acc:HGNC:5988]
ZBP1	ENSG00000124256	NK	C3	C3.073	protein_coding	Z-DNA binding protein 1 [Source:HGNC Symbol;Acc:HGNC:16176]
CDK6	ENSG00000105810	NK	C3	C3.074	protein_coding	cyclin dependent kinase 6 [Source:HGNC Symbol;Acc:HGNC:1777]
NCR3	ENSG00000236315	NK	C3	C3.075	protein_coding	natural cytotoxicity triggering receptor 3 [Source:HGNC Symbol;Acc:HGNC:19077]
CD247	ENSG00000198821	NK	C3	C3.076	protein_coding	CD247 molecule [Source:HGNC Symbol;Acc:HGNC:1677]
RAB27B	ENSG00000041353	NK	C3	C3.077	protein_coding	RAB27B, member RAS oncogene family [Source:HGNC Symbol;Acc:HGNC:9767]
COLQ	ENSG00000206561	NK	C3	C3.078	protein_coding	collagen like tail subunit of asymmetric acetylcholinesterase [Source:HGNC Symbol;Acc:HGNC:2226]
LTA	ENSG00000230279	NK	C3	C3.079	protein_coding	lymphotoxin alpha [Source:HGNC Symbol;Acc:HGNC:6709]
CCL5	ENSG00000274233	NK	C3	C3.080	protein_coding	C-C motif chemokine ligand 5 [Source:HGNC Symbol;Acc:HGNC:10632]
NAALADL1	ENSG00000168060	NK	C3	C3.081	protein_coding	N-acetylated alpha-linked acidic dipeptidase like 1 [Source:HGNC Symbol;Acc:HGNC:23536]
CDHR1	ENSG00000148600	NK	C3	C3.082	protein_coding	cadherin related family member 1 [Source:HGNC Symbol;Acc:HGNC:14550]
IL2RB	ENSG00000100385	NK	C3	C3.083	protein_coding	interleukin 2 receptor subunit beta [Source:HGNC Symbol;Acc:HGNC:6009]
RNASE6	ENSG00000169413	NK	C3	C3.084	protein_coding	ribonuclease A family member k6 [Source:HGNC Symbol;Acc:HGNC:10048]
CD244	ENSG00000122223	NK	C3	C3.085	protein_coding	CD244 molecule [Source:HGNC Symbol;Acc:HGNC:18171]
KLRC3	ENSG00000205810	NK	C3	C3.086	protein_coding	killer cell lectin like receptor C3 [Source:HGNC Symbol;Acc:HGNC:6376]
CTSW	ENSG00000172543	NK	C3	C3.087	protein_coding	cathepsin W [Source:HGNC Symbol;Acc:HGNC:2546]
PRF1	ENSG00000180644	NK	C3	C3.088	protein_coding	perforin 1 [Source:HGNC Symbol;Acc:HGNC:9360]
PRR5L	ENSG00000135362	NK	C3	C3.089	protein_coding	proline rich 5 like [Source:HGNC Symbol;Acc:HGNC:25878]
TBX21	ENSG00000073861	NK	C3	C3.090	protein_coding	T-box transcription factor 21 [Source:HGNC Symbol;Acc:HGNC:11599]
GZMB	ENSG00000100453	NK	C3	C3.091	protein_coding	granzyme B [Source:HGNC Symbol;Acc:HGNC:4709]
IL12RB2	ENSG00000081985	NK	C3	C3.092	protein_coding	interleukin 12 receptor subunit beta 2 [Source:HGNC Symbol;Acc:HGNC:5972]
GZMA	ENSG00000145649	NK	C3	C3.093	protein_coding	granzyme A [Source:HGNC Symbol;Acc:HGNC:4708]
NKG7	ENSG00000105374	NK	C3	C3.094	protein_coding	natural killer cell granule protein 7 [Source:HGNC Symbol;Acc:HGNC:7830]
CD86	ENSG00000114013	Monocyte	C4	C4.001	protein_coding	CD86 molecule [Source:HGNC Symbol;Acc:HGNC:1705]
SLC2A6	ENSG00000281165	Monocyte	C4	C4.002	protein_coding	solute carrier family 2 member 6 [Source:HGNC Symbol;Acc:HGNC:11011]
CAMP	ENSG00000164047	Monocyte	C4	C4.003	protein_coding	cathelicidin antimicrobial peptide [Source:HGNC Symbol;Acc:HGNC:1472]
KYNU	ENSG00000115919	Monocyte	C4	C4.004	protein_coding	kynureninase [Source:HGNC Symbol;Acc:HGNC:6469]
P2RY14	ENSG00000174944	Monocyte	C4	C4.005	protein_coding	purinergic receptor P2Y14 [Source:HGNC Symbol;Acc:HGNC:16442]
CLIC2	ENSG00000155962	Monocyte	C4	C4.006	protein_coding	chloride intracellular channel 2 [Source:HGNC Symbol;Acc:HGNC:2063]
ARRB1	ENSG00000137486	Monocyte	C4	C4.007	protein_coding	arrestin beta 1 [Source:HGNC Symbol;Acc:HGNC:711]
RASSF4	ENSG00000107551	Monocyte	C4	C4.008	protein_coding	Ras association domain family member 4 [Source:HGNC Symbol;Acc:HGNC:20793]
MARCO	ENSG00000019169	Monocyte	C4	C4.009	protein_coding	macrophage receptor with collagenous structure [Source:HGNC Symbol;Acc:HGNC:6895]
CYP27A1	ENSG00000135929	Monocyte	C4	C4.010	protein_coding	cytochrome P450 family 27 subfamily A member 1 [Source:HGNC Symbol;Acc:HGNC:2605]
P2RY2	ENSG00000175591	Monocyte	C4	C4.011	protein_coding	purinergic receptor P2Y2 [Source:HGNC Symbol;Acc:HGNC:8541]
UPK3A	ENSG00000100373	Monocyte	C4	C4.012	protein_coding	uroplakin 3A [Source:HGNC Symbol;Acc:HGNC:12580]
TLR7	ENSG00000196664	Monocyte	C4	C4.013	protein_coding	toll like receptor 7 [Source:HGNC Symbol;Acc:HGNC:15631]
ASGR1	ENSG00000141505	Monocyte	C4	C4.014	protein_coding	asialoglycoprotein receptor 1 [Source:HGNC Symbol;Acc:HGNC:742]
MS4A6A	ENSG00000110077	Monocyte	C4	C4.015	protein_coding	membrane spanning 4-domains A6A [Source:HGNC Symbol;Acc:HGNC:13375]
CD1D	ENSG00000158473	Monocyte	C4	C4.016	protein_coding	CD1d molecule [Source:HGNC Symbol;Acc:HGNC:1637]
FCN1	ENSG00000085265	Monocyte	C4	C4.017	protein_coding	ficolin 1 [Source:HGNC Symbol;Acc:HGNC:3623]
LILRA3	ENSG00000273884	Monocyte	C4	C4.018	protein_coding	leukocyte immunoglobulin like receptor A3 [Source:HGNC Symbol;Acc:HGNC:6604]
CD68	ENSG00000129226	Monocyte	C4	C4.019	protein_coding	CD68 molecule [Source:HGNC Symbol;Acc:HGNC:1693]
RNASE2	ENSG00000169385	Monocyte	C4	C4.020	protein_coding	ribonuclease A family member 2 [Source:HGNC Symbol;Acc:HGNC:10045]
FZD2	ENSG00000180340	Monocyte	C4	C4.021	protein_coding	frizzled class receptor 2 [Source:HGNC Symbol;Acc:HGNC:4040]
PLA2G7	ENSG00000146070	Monocyte	C4	C4.022	protein_coding	phospholipase A2 group VII [Source:HGNC Symbol;Acc:HGNC:9040]
ASGR2	ENSG00000161944	Monocyte	C4	C4.023	protein_coding	asialoglycoprotein receptor 2 [Source:HGNC Symbol;Acc:HGNC:743]
FAM198B	ENSG00000164125	Monocyte	C4	C4.024	protein-coding gene	Golgi associated kinase family
CD33	ENSG00000105383	Monocyte	C4	C4.025	protein_coding	CD33 molecule [Source:HGNC Symbol;Acc:HGNC:1659]
HNMT	ENSG00000150540	Monocyte	C4	C4.026	protein_coding	histamine N-methyltransferase [Source:HGNC Symbol;Acc:HGNC:5028]
DAPK2	ENSG00000035664	Neutrophil	C5	C5.001	protein_coding	death associated protein kinase 2 [Source:HGNC Symbol;Acc:HGNC:2675]
GPR97	ENSG00000182885	Neutrophil	C5	C5.001	protein-coding gene	Adhesion G protein-coupled receptors, subfamily G
CCR3	ENSG00000183625	Neutrophil	C5	C5.002	protein_coding	C-C motif chemokine receptor 3 [Source:HGNC Symbol;Acc:HGNC:1604]
MMP9	ENSG00000100985	Neutrophil	C5	C5.003	protein_coding	matrix metallopeptidase 9 [Source:HGNC Symbol;Acc:HGNC:7176]
CXCR1	ENSG00000163464	Neutrophil	C5	C5.004	protein_coding	C-X-C motif chemokine receptor 1 [Source:HGNC Symbol;Acc:HGNC:6026]
TREML2	ENSG00000112195	Neutrophil	C5	C5.005	protein_coding	triggering receptor expressed on myeloid cells like 2 [Source:HGNC Symbol;Acc:HGNC:21092]
FAM212B	ENSG00000197852	Neutrophil	C5	C5.006	protein-coding gene
HAL	ENSG00000084110	Neutrophil	C5	C5.007	protein_coding	histidine ammonia-lyase [Source:HGNC Symbol;Acc:HGNC:4806]
IL1B	ENSG00000125538	Neutrophil	C5	C5.008	protein_coding	interleukin 1 beta [Source:HGNC Symbol;Acc:HGNC:5992]
CEACAM3	ENSG00000170956	Neutrophil	C5	C5.009	protein_coding	CEA cell adhesion molecule 3 [Source:HGNC Symbol;Acc:HGNC:1815]
MMP25	ENSG00000008516	Neutrophil	C5	C5.010	protein_coding	matrix metallopeptidase 25 [Source:HGNC Symbol;Acc:HGNC:14246]
EMR3	ENSG00000131355	Neutrophil	C5	C5.011	protein-coding gene	Adhesion G protein-coupled receptors, subfamily E
HSPA6	ENSG00000173110	Neutrophil	C5	C5.012	protein_coding	heat shock protein family A (Hsp70) member 6 [Source:HGNC Symbol;Acc:HGNC:5239]
C5AR2	ENSG00000134830	Neutrophil	C5	C5.013	protein_coding	complement component 5a receptor 2 [Source:HGNC Symbol;Acc:HGNC:4527]
MXD1	ENSG00000059728	Neutrophil	C5	C5.014	protein_coding	MAX dimerization protein 1 [Source:HGNC Symbol;Acc:HGNC:6761]
BCL2A1	ENSG00000140379	Neutrophil	C5	C5.015	protein_coding	BCL2 related protein A1 [Source:HGNC Symbol;Acc:HGNC:991]
CASP5	ENSG00000137757	Neutrophil	C5	C5.016	protein_coding	caspase 5 [Source:HGNC Symbol;Acc:HGNC:1506]
APOBEC3A	ENSG00000262156	Neutrophil	C5	C5.017	protein_coding	apolipoprotein B mRNA editing enzyme catalytic subunit 3A [Source:HGNC Symbol;Acc:HGNC:17343]
NPL	ENSG00000135838	Neutrophil	C5	C5.018	protein_coding	N-acetylneuraminate pyruvate lyase [Source:HGNC Symbol;Acc:HGNC:16781]
C5AR1	ENSG00000197405	Neutrophil	C5	C5.019	protein_coding	complement C5a receptor 1 [Source:HGNC Symbol;Acc:HGNC:1338]
FPR1	ENSG00000171051	Neutrophil	C5	C5.020	protein_coding	formyl peptide receptor 1 [Source:HGNC Symbol;Acc:HGNC:3826]
CREB5	ENSG00000146592	Neutrophil	C5	C5.021	protein_coding	cAMP responsive element binding protein 5 [Source:HGNC Symbol;Acc:HGNC:16844]
CSF3R	ENSG00000119535	Neutrophil	C5	C5.022	protein_coding	colony stimulating factor 3 receptor [Source:HGNC Symbol;Acc:HGNC:2439]
CDA	ENSG00000158825	Neutrophil	C5	C5.023	protein_coding	cytidine deaminase [Source:HGNC Symbol;Acc:HGNC:1712]
EMR2	ENSG00000127507	Neutrophil	C5	C5.024	protein-coding gene	Adhesion G protein-coupled receptors, subfamily E|CD molecules
AQP9	ENSG00000103569	Neutrophil	C5	C5.025	protein_coding	aquaporin 9 [Source:HGNC Symbol;Acc:HGNC:643]
FPR2	ENSG00000171049	Neutrophil	C5	C5.026	protein_coding	formyl peptide receptor 2 [Source:HGNC Symbol;Acc:HGNC:3827]
TREM1	ENSG00000124731	Neutrophil	C5	C5.027	protein_coding	triggering receptor expressed on myeloid cells 1 [Source:HGNC Symbol;Acc:HGNC:17760]
STEAP4	ENSG00000127954	Neutrophil	C5	C5.028	protein_coding	STEAP4 metalloreductase [Source:HGNC Symbol;Acc:HGNC:21923]
VNN2	ENSG00000112303	Neutrophil	C5	C5.029	protein_coding	vanin 2 [Source:HGNC Symbol;Acc:HGNC:12706]
VNN3	ENSG00000093134	Neutrophil	C5	C5.030	protein_coding	vanin 3 [Source:HGNC Symbol;Acc:HGNC:16431]
REPS2	ENSG00000169891	Neutrophil	C5	C5.031	protein_coding	RALBP1 associated Eps domain containing 2 [Source:HGNC Symbol;Acc:HGNC:9963]
TNFRSF10C	ENSG00000173535	Neutrophil	C5	C5.032	protein_coding	TNF receptor superfamily member 10c [Source:HGNC Symbol;Acc:HGNC:11906]
FCGR3B	ENSG00000162747	Neutrophil	C5	C5.033	protein_coding	Fc fragment of IgG receptor IIIb [Source:HGNC Symbol;Acc:HGNC:3620]
FFAR2	ENSG00000126262	Neutrophil	C5	C5.034	protein_coding	free fatty acid receptor 2 [Source:HGNC Symbol;Acc:HGNC:4501]
PGLYRP1	ENSG00000008438	Neutrophil	C5	C5.035	protein_coding	peptidoglycan recognition protein 1 [Source:HGNC Symbol;Acc:HGNC:8904]
CHI3L1	ENSG00000133048	Neutrophil	C5	C5.036	protein_coding	chitinase 3 like 1 [Source:HGNC Symbol;Acc:HGNC:1932]
CXCR2	ENSG00000180871	Neutrophil	C5	C5.037	protein_coding	C-X-C motif chemokine receptor 2 [Source:HGNC Symbol;Acc:HGNC:6027]
MGAM	ENSG00000282607	Neutrophil	C5	C5.038	protein_coding	maltase-glucoamylase [Source:HGNC Symbol;Acc:HGNC:7043]
CLC	ENSG00000105205	Neutrophil	C5	C5.039	protein_coding	Charcot-Leyden crystal galectin [Source:HGNC Symbol;Acc:HGNC:2014]
TNFAIP6	ENSG00000123610	Neutrophil	C5	C5.040	protein_coding	TNF alpha induced protein 6 [Source:HGNC Symbol;Acc:HGNC:11898]
BTNL8	ENSG00000113303	Neutrophil	C5	C5.041	protein_coding	butyrophilin like 8 [Source:HGNC Symbol;Acc:HGNC:26131]
MAK	ENSG00000111837	Neutrophil	C5	C5.042	protein_coding	male germ cell associated kinase [Source:HGNC Symbol;Acc:HGNC:6816]
OSM	ENSG00000099985	Neutrophil	C5	C5.043	protein_coding	oncostatin M [Source:HGNC Symbol;Acc:HGNC:8506]
PLEKHG3	ENSG00000126822	Neutrophil	C5	C5.044	protein_coding	pleckstrin homology and RhoGEF domain containing G3 [Source:HGNC Symbol;Acc:HGNC:20364]
DPEP2	ENSG00000167261	Neutrophil	C5	C5.045	protein_coding	dipeptidase 2 [Source:HGNC Symbol;Acc:HGNC:23028]
P2RX1	ENSG00000108405	Neutrophil	C5	C5.046	protein_coding	purinergic receptor P2X 1 [Source:HGNC Symbol;Acc:HGNC:8533]
CHST7	ENSG00000147119	Neutrophil	C5	C5.047	protein_coding	carbohydrate sulfotransferase 7 [Source:HGNC Symbol;Acc:HGNC:13817]
PPBP	ENSG00000163736	Neutrophil	C5	C5.048	protein_coding	pro-platelet basic protein [Source:HGNC Symbol;Acc:HGNC:9240]
TRPM6	ENSG00000119121	Neutrophil	C5	C5.049	protein_coding	transient receptor potential cation channel subfamily M member 6 [Source:HGNC Symbol;Acc:HGNC:17995]
