# Supplementary material for: Comparative Analysis of Cell Mixtures Deconvolution and Gene Signatures Generated for Blood, Immune and Cancer Cells
Source: Preprints.org preprint supplement (doi:10.20944/preprints202304.1073.v1), 2023-04-27
Supplement: Supplementary file 4 [file SupplementaryTable3S_LINSEED_117g_Heatmap.xlsx]

## Sheet: Ordered as in Heatmap 117g
GeneID	ensembl_gene_id	CellType	Cluster	Cluster_Norder	gene_biotype	description
CD247	ENSG00000198821	NK	C1	C1.001	protein_coding	CD247 molecule [Source:HGNC Symbol;Acc:HGNC:1677]
KLRC4	ENSG00000183542	NK	C1	C1.002	protein_coding	killer cell lectin like receptor C4 [Source:HGNC Symbol;Acc:HGNC:6377]
CD7	ENSG00000173762	NK	C1	C1.003	protein_coding	CD7 molecule [Source:HGNC Symbol;Acc:HGNC:1695]
KLRB1	ENSG00000111796	NK	C1	C1.004	protein_coding	killer cell lectin like receptor B1 [Source:HGNC Symbol;Acc:HGNC:6373]
CCL5	ENSG00000274233	NK	C1	C1.005	protein_coding	C-C motif chemokine ligand 5 [Source:HGNC Symbol;Acc:HGNC:10632]
PVRIG	ENSG00000213413	NK	C1	C1.006	protein_coding	PVR related immunoglobulin domain containing [Source:HGNC Symbol;Acc:HGNC:32190]
ATP8B4	ENSG00000104043	NK	C1	C1.007	protein_coding	ATPase phospholipid transporting 8B4 (putative) [Source:HGNC Symbol;Acc:HGNC:13536]
CD244	ENSG00000122223	NK	C1	C1.008	protein_coding	CD244 molecule [Source:HGNC Symbol;Acc:HGNC:18171]
PTGER2	ENSG00000125384	NK	C1	C1.009	protein_coding	prostaglandin E receptor 2 [Source:HGNC Symbol;Acc:HGNC:9594]
IL12RB2	ENSG00000081985	NK	C1	C1.010	protein_coding	interleukin 12 receptor subunit beta 2 [Source:HGNC Symbol;Acc:HGNC:5972]
NKG7	ENSG00000105374	NK	C1	C1.011	protein_coding	natural killer cell granule protein 7 [Source:HGNC Symbol;Acc:HGNC:7830]
GNLY	ENSG00000115523	NK	C1	C1.012	protein_coding	granulysin [Source:HGNC Symbol;Acc:HGNC:4414]
NCR3	ENSG00000236315	NK	C1	C1.013	protein_coding	natural cytotoxicity triggering receptor 3 [Source:HGNC Symbol;Acc:HGNC:19077]
GZMA	ENSG00000145649	NK	C1	C1.014	protein_coding	granzyme A [Source:HGNC Symbol;Acc:HGNC:4708]
KLRD1	ENSG00000134539	NK	C1	C1.015	protein_coding	killer cell lectin like receptor D1 [Source:HGNC Symbol;Acc:HGNC:6378]
PRF1	ENSG00000180644	NK	C1	C1.016	protein_coding	perforin 1 [Source:HGNC Symbol;Acc:HGNC:9360]
CTSW	ENSG00000172543	NK	C1	C1.017	protein_coding	cathepsin W [Source:HGNC Symbol;Acc:HGNC:2546]
CCL4	ENSG00000277943	NK	C1	C1.018	protein_coding	C-C motif chemokine ligand 4 [Source:HGNC Symbol;Acc:HGNC:10630]
KLRC3	ENSG00000205810	NK	C1	C1.019	protein_coding	killer cell lectin like receptor C3 [Source:HGNC Symbol;Acc:HGNC:6376]
GZMB	ENSG00000100453	NK	C1	C1.020	protein_coding	granzyme B [Source:HGNC Symbol;Acc:HGNC:4709]
KIR2DL4	ENSG00000276779	NK	C1	C1.021	protein_coding	killer cell immunoglobulin like receptor, two Ig domains and long cytoplasmic tail 4 [Source:HGNC Symbol;Acc:HGNC:6332]
KIR2DS4	ENSG00000274324	NK	C1	C1.022	polymorphic_pseudogene	killer cell immunoglobulin like receptor, two Ig domains and short cytoplasmic tail 4 [Source:HGNC Symbol;Acc:HGNC:6336]
FASLG	ENSG00000117560	NK	C1	C1.023	protein_coding	Fas ligand [Source:HGNC Symbol;Acc:HGNC:11936]
KLRF1	ENSG00000150045	NK	C1	C1.024	protein_coding	killer cell lectin like receptor F1 [Source:HGNC Symbol;Acc:HGNC:13342]
APOBEC3G	ENSG00000239713	NK	C1	C1.025	protein_coding	apolipoprotein B mRNA editing enzyme catalytic subunit 3G [Source:HGNC Symbol;Acc:HGNC:17357]
KIR2DL1	ENSG00000276820	NK	C1	C1.026	protein_coding	killer cell immunoglobulin like receptor, two Ig domains and long cytoplasmic tail 1 [Source:HGNC Symbol;Acc:HGNC:6329]
CST7	ENSG00000077984	NK	C1	C1.027	protein_coding	cystatin F [Source:HGNC Symbol;Acc:HGNC:2479]
TBX21	ENSG00000073861	NK	C1	C1.028	protein_coding	T-box transcription factor 21 [Source:HGNC Symbol;Acc:HGNC:11599]
GZMH	ENSG00000100450	NK	C1	C1.029	protein_coding	granzyme H [Source:HGNC Symbol;Acc:HGNC:4710]
PRR5L	ENSG00000135362	NK	C1	C1.030	protein_coding	proline rich 5 like [Source:HGNC Symbol;Acc:HGNC:25878]
CD160	ENSG00000117281	NK	C1	C1.031	protein_coding	CD160 molecule [Source:HGNC Symbol;Acc:HGNC:17013]
IL2RB	ENSG00000100385	NK	C1	C1.032	protein_coding	interleukin 2 receptor subunit beta [Source:HGNC Symbol;Acc:HGNC:6009]
LAIR2	ENSG00000274084	NK	C1	C1.033	protein_coding	leukocyte associated immunoglobulin like receptor 2 [Source:HGNC Symbol;Acc:HGNC:6478]
PTGDR	ENSG00000168229	NK	C1	C1.034	protein_coding	prostaglandin D2 receptor [Source:HGNC Symbol;Acc:HGNC:9591]
ITK	ENSG00000113263	Tcell	C2	C2.001	protein_coding	IL2 inducible T cell kinase [Source:HGNC Symbol;Acc:HGNC:6171]
CD3E	ENSG00000198851	Tcell	C2	C2.002	protein_coding	CD3e molecule [Source:HGNC Symbol;Acc:HGNC:1674]
CD3G	ENSG00000160654	Tcell	C2	C2.003	protein_coding	CD3g molecule [Source:HGNC Symbol;Acc:HGNC:1675]
CD3D	ENSG00000167286	Tcell	C2	C2.004	protein_coding	CD3d molecule [Source:HGNC Symbol;Acc:HGNC:1673]
BCL11B	ENSG00000127152	Tcell	C2	C2.005	protein_coding	BAF chromatin remodeling complex subunit BCL11B [Source:HGNC Symbol;Acc:HGNC:13222]
UBASH3A	ENSG00000160185	Tcell	C2	C2.006	protein_coding	ubiquitin associated and SH3 domain containing A [Source:HGNC Symbol;Acc:HGNC:12462]
CD40LG	ENSG00000102245	Tcell	C2	C2.007	protein_coding	CD40 ligand [Source:HGNC Symbol;Acc:HGNC:11935]
TRAC	ENSG00000277734	Tcell	C2	C2.008	TR_C_gene	T cell receptor alpha constant [Source:HGNC Symbol;Acc:HGNC:12029]
TRAT1	ENSG00000163519	Tcell	C2	C2.009	protein_coding	T cell receptor associated transmembrane adaptor 1 [Source:HGNC Symbol;Acc:HGNC:30698]
GPR171	ENSG00000174946	Tcell	C2	C2.010	protein_coding	G protein-coupled receptor 171 [Source:HGNC Symbol;Acc:HGNC:30057]
ANKRD55	ENSG00000164512	Tcell	C2	C2.011	protein_coding	ankyrin repeat domain 55 [Source:HGNC Symbol;Acc:HGNC:25681]
ICOS	ENSG00000163600	Tcell	C2	C2.012	protein_coding	inducible T cell costimulator [Source:HGNC Symbol;Acc:HGNC:5351]
CD28	ENSG00000178562	Tcell	C2	C2.013	protein_coding	CD28 molecule [Source:HGNC Symbol;Acc:HGNC:1653]
KCNA3	ENSG00000177272	Tcell	C2	C2.014	protein_coding	potassium voltage-gated channel subfamily A member 3 [Source:HGNC Symbol;Acc:HGNC:6221]
SIRPG	ENSG00000089012	Tcell	C2	C2.015	protein_coding	signal regulatory protein gamma [Source:HGNC Symbol;Acc:HGNC:15757]
IL7R	ENSG00000168685	Tcell	C2	C2.016	protein_coding	interleukin 7 receptor [Source:HGNC Symbol;Acc:HGNC:6024]
LEF1	ENSG00000138795	Tcell	C2	C2.017	protein_coding	lymphoid enhancer binding factor 1 [Source:HGNC Symbol;Acc:HGNC:6551]
TCF7	ENSG00000081059	Tcell	C2	C2.018	protein_coding	transcription factor 7 [Source:HGNC Symbol;Acc:HGNC:11639]
CD5	ENSG00000110448	Tcell	C2	C2.019	protein_coding	CD5 molecule [Source:HGNC Symbol;Acc:HGNC:1685]
STAP1	ENSG00000035720	Bcell	C3	C3.001	protein_coding	signal transducing adaptor family member 1 [Source:HGNC Symbol;Acc:HGNC:24133]
CD72	ENSG00000137101	Bcell	C3	C3.002	protein_coding	CD72 molecule [Source:HGNC Symbol;Acc:HGNC:1696]
TMEM156	ENSG00000121895	Bcell	C3	C3.003	protein_coding	transmembrane protein 156 [Source:HGNC Symbol;Acc:HGNC:26260]
MS4A1	ENSG00000156738	Bcell	C3	C3.004	protein_coding	membrane spanning 4-domains A1 [Source:HGNC Symbol;Acc:HGNC:7315]
IGHM	ENSG00000282657	Bcell	C3	C3.005	IG_C_gene	immunoglobulin heavy constant mu [Source:HGNC Symbol;Acc:HGNC:5541]
P2RX5	ENSG00000083454	Bcell	C3	C3.006	protein_coding	purinergic receptor P2X 5 [Source:HGNC Symbol;Acc:HGNC:8536]
ADAM28	ENSG00000042980	Bcell	C3	C3.007	protein_coding	ADAM metallopeptidase domain 28 [Source:HGNC Symbol;Acc:HGNC:206]
IGHD	ENSG00000278801	Bcell	C3	C3.008	IG_C_gene	immunoglobulin heavy constant delta [Source:HGNC Symbol;Acc:HGNC:5480]
CD19	ENSG00000177455	Bcell	C3	C3.009	protein_coding	CD19 molecule [Source:HGNC Symbol;Acc:HGNC:1633]
FCRL2	ENSG00000132704	Bcell	C3	C3.010	protein_coding	Fc receptor like 2 [Source:HGNC Symbol;Acc:HGNC:14875]
RASGRP3	ENSG00000152689	Bcell	C3	C3.011	protein_coding	RAS guanyl releasing protein 3 [Source:HGNC Symbol;Acc:HGNC:14545]
TNFRSF17	ENSG00000048462	Bcell	C3	C3.012	protein_coding	TNF receptor superfamily member 17 [Source:HGNC Symbol;Acc:HGNC:11913]
TCL1A	ENSG00000100721	Bcell	C3	C3.013	protein_coding	TCL1 family AKT coactivator A [Source:HGNC Symbol;Acc:HGNC:11648]
VPREB3	ENSG00000128218	Bcell	C3	C3.014	protein_coding	V-set pre-B cell surrogate light chain 3 [Source:HGNC Symbol;Acc:HGNC:12710]
PNOC	ENSG00000168081	Bcell	C3	C3.015	protein_coding	prepronociceptin [Source:HGNC Symbol;Acc:HGNC:9163]
SPIB	ENSG00000269404	Bcell	C3	C3.016	protein_coding	Spi-B transcription factor [Source:HGNC Symbol;Acc:HGNC:11242]
CD22	ENSG00000012124	Bcell	C3	C3.017	protein_coding	CD22 molecule [Source:HGNC Symbol;Acc:HGNC:1643]
BANK1	ENSG00000153064	Bcell	C3	C3.018	protein_coding	B cell scaffold protein with ankyrin repeats 1 [Source:HGNC Symbol;Acc:HGNC:18233]
TNFRSF13B	ENSG00000240505	Bcell	C3	C3.019	protein_coding	TNF receptor superfamily member 13B [Source:HGNC Symbol;Acc:HGNC:18153]
CXCR5	ENSG00000160683	Bcell	C3	C3.020	protein_coding	C-X-C motif chemokine receptor 5 [Source:HGNC Symbol;Acc:HGNC:1060]
RALGPS2	ENSG00000116191	Bcell	C3	C3.021	protein_coding	Ral GEF with PH domain and SH3 binding motif 2 [Source:HGNC Symbol;Acc:HGNC:30279]
RNASE2	ENSG00000169385	Monocyte	C4	C4.001	protein_coding	ribonuclease A family member 2 [Source:HGNC Symbol;Acc:HGNC:10045]
FCN1	ENSG00000085265	Monocyte	C4	C4.002	protein_coding	ficolin 1 [Source:HGNC Symbol;Acc:HGNC:3623]
CD86	ENSG00000114013	Monocyte	C4	C4.003	protein_coding	CD86 molecule [Source:HGNC Symbol;Acc:HGNC:1705]
IL1B	ENSG00000125538	Monocyte	C4	C4.004	protein_coding	interleukin 1 beta [Source:HGNC Symbol;Acc:HGNC:5992]
ASGR2	ENSG00000161944	Monocyte	C4	C4.005	protein_coding	asialoglycoprotein receptor 2 [Source:HGNC Symbol;Acc:HGNC:743]
CD33	ENSG00000105383	Monocyte	C4	C4.006	protein_coding	CD33 molecule [Source:HGNC Symbol;Acc:HGNC:1659]
ASGR1	ENSG00000141505	Monocyte	C4	C4.007	protein_coding	asialoglycoprotein receptor 1 [Source:HGNC Symbol;Acc:HGNC:742]
MARCO	ENSG00000019169	Monocyte	C4	C4.008	protein_coding	macrophage receptor with collagenous structure [Source:HGNC Symbol;Acc:HGNC:6895]
CD1D	ENSG00000158473	Monocyte	C4	C4.009	protein_coding	CD1d molecule [Source:HGNC Symbol;Acc:HGNC:1637]
MS4A6A	ENSG00000110077	Monocyte	C4	C4.010	protein_coding	membrane spanning 4-domains A6A [Source:HGNC Symbol;Acc:HGNC:13375]
CCR2	ENSG00000121807	Monocyte	C4	C4.011	protein_coding	C-C motif chemokine receptor 2 [Source:HGNC Symbol;Acc:HGNC:1603]
HSPA6	ENSG00000173110	Neutrophil	C5	C5.001	protein_coding	heat shock protein family A (Hsp70) member 6 [Source:HGNC Symbol;Acc:HGNC:5239]
NPL	ENSG00000135838	Neutrophil	C5	C5.002	protein_coding	N-acetylneuraminate pyruvate lyase [Source:HGNC Symbol;Acc:HGNC:16781]
P2RY13	ENSG00000181631	Neutrophil	C5	C5.003	protein_coding	purinergic receptor P2Y13 [Source:HGNC Symbol;Acc:HGNC:4537]
VNN1	ENSG00000112299	Neutrophil	C5	C5.004	protein_coding	vanin 1 [Source:HGNC Symbol;Acc:HGNC:12705]
LILRA2	ENSG00000274000	Neutrophil	C5	C5.005	protein_coding	leukocyte immunoglobulin like receptor A2 [Source:HGNC Symbol;Acc:HGNC:6603]
QPCT	ENSG00000115828	Neutrophil	C5	C5.006	protein_coding	glutaminyl-peptide cyclotransferase [Source:HGNC Symbol;Acc:HGNC:9753]
HAL	ENSG00000084110	Neutrophil	C5	C5.007	protein_coding	histidine ammonia-lyase [Source:HGNC Symbol;Acc:HGNC:4806]
CREB5	ENSG00000146592	Neutrophil	C5	C5.008	protein_coding	cAMP responsive element binding protein 5 [Source:HGNC Symbol;Acc:HGNC:16844]
STEAP4	ENSG00000127954	Neutrophil	C5	C5.009	protein_coding	STEAP4 metalloreductase [Source:HGNC Symbol;Acc:HGNC:21923]
VNN2	ENSG00000112303	Neutrophil	C5	C5.010	protein_coding	vanin 2 [Source:HGNC Symbol;Acc:HGNC:12706]
C5AR1	ENSG00000197405	Neutrophil	C5	C5.011	protein_coding	complement C5a receptor 1 [Source:HGNC Symbol;Acc:HGNC:1338]
TREM1	ENSG00000124731	Neutrophil	C5	C5.012	protein_coding	triggering receptor expressed on myeloid cells 1 [Source:HGNC Symbol;Acc:HGNC:17760]
MXD1	ENSG00000059728	Neutrophil	C5	C5.013	protein_coding	MAX dimerization protein 1 [Source:HGNC Symbol;Acc:HGNC:6761]
FPR1	ENSG00000171051	Neutrophil	C5	C5.014	protein_coding	formyl peptide receptor 1 [Source:HGNC Symbol;Acc:HGNC:3826]
CLC	ENSG00000105205	Neutrophil	C5	C5.015	protein_coding	Charcot-Leyden crystal galectin [Source:HGNC Symbol;Acc:HGNC:2014]
SLC12A1	ENSG00000074803	Neutrophil	C5	C5.016	protein_coding	solute carrier family 12 member 1 [Source:HGNC Symbol;Acc:HGNC:10910]
VNN3	ENSG00000093134	Neutrophil	C5	C5.017	protein_coding	vanin 3 [Source:HGNC Symbol;Acc:HGNC:16431]
TNFAIP6	ENSG00000123610	Neutrophil	C5	C5.018	protein_coding	TNF alpha induced protein 6 [Source:HGNC Symbol;Acc:HGNC:11898]
MGAM	ENSG00000282607	Neutrophil	C5	C5.019	protein_coding	maltase-glucoamylase [Source:HGNC Symbol;Acc:HGNC:7043]
DAPK2	ENSG00000035664	Neutrophil	C5	C5.020	protein_coding	death associated protein kinase 2 [Source:HGNC Symbol;Acc:HGNC:2675]
CXCR2	ENSG00000180871	Neutrophil	C5	C5.021	protein_coding	C-X-C motif chemokine receptor 2 [Source:HGNC Symbol;Acc:HGNC:6027]
FCGR3B	ENSG00000162747	Neutrophil	C5	C5.022	protein_coding	Fc fragment of IgG receptor IIIb [Source:HGNC Symbol;Acc:HGNC:3620]
CXCR1	ENSG00000163464	Neutrophil	C5	C5.023	protein_coding	C-X-C motif chemokine receptor 1 [Source:HGNC Symbol;Acc:HGNC:6026]
C5AR2	ENSG00000134830	Neutrophil	C5	C5.024	protein_coding	complement component 5a receptor 2 [Source:HGNC Symbol;Acc:HGNC:4527]
REPS2	ENSG00000169891	Neutrophil	C5	C5.025	protein_coding	RALBP1 associated Eps domain containing 2 [Source:HGNC Symbol;Acc:HGNC:9963]
CCR3	ENSG00000183625	Neutrophil	C5	C5.026	protein_coding	C-C motif chemokine receptor 3 [Source:HGNC Symbol;Acc:HGNC:1604]
TRPM6	ENSG00000119121	Neutrophil	C5	C5.027	protein_coding	transient receptor potential cation channel subfamily M member 6 [Source:HGNC Symbol;Acc:HGNC:17995]
AQP9	ENSG00000103569	Neutrophil	C5	C5.028	protein_coding	aquaporin 9 [Source:HGNC Symbol;Acc:HGNC:643]
MMP9	ENSG00000100985	Neutrophil	C5	C5.029	protein_coding	matrix metallopeptidase 9 [Source:HGNC Symbol;Acc:HGNC:7176]
BCL2A1	ENSG00000140379	Neutrophil	C5	C5.030	protein_coding	BCL2 related protein A1 [Source:HGNC Symbol;Acc:HGNC:991]
CHI3L1	ENSG00000133048	Neutrophil	C5	C5.031	protein_coding	chitinase 3 like 1 [Source:HGNC Symbol;Acc:HGNC:1932]
FPR2	ENSG00000171049	Neutrophil	C5	C5.032	protein_coding	formyl peptide receptor 2 [Source:HGNC Symbol;Acc:HGNC:3827]
