# Supplementary material for: Comparative Analysis of Cell Mixtures Deconvolution and Gene Signatures Generated for Blood, Immune and Cancer Cells
Source: Preprints.org preprint supplement (doi:10.20944/preprints202304.1073.v1), 2023-04-27
Supplement: Supplementary file 5 [file SupplementaryTable4S_LINSEED_ExpressionZscore.xlsx]

## Sheet: 117 genes
GeneSymbol	Neutrophils	Monocytes	Bcell	NK	Tcell
ADAM28	0.0809563	0.0282967	0.292027	0.0616692	0.00517487
ANKRD55	0.0814248	0	0.0290779	0	0.317423
APOBEC3G	0.0706029	0.0461825	0.0538033	0.364197	0.0415374
AQP9	0.342502	0.0242078	0.0571689	0.0237474	0.0393324
ASGR1	0.0119578	0.294202	0.0595003	0.0411619	0.0252035
ASGR2	0.0331219	0.29551	0.0401239	0.0351736	0.0299401
ATP8B4	0.0972615	0.0767069	0	0.411575	0
BANK1	0.0389896	0.00870217	0.377399	0.00207646	0.00877549
BCL11B	0.0395854	0	0.0137659	0.0938227	0.326529
BCL2A1	0.284686	0.0359346	0.057852	0.0310749	0.0740867
C5AR1	0.317594	0.0624031	0.0447743	0.00831043	0.0454473
C5AR2	0.421766	0.0123517	0.0215108	0.0333201	0
CCL4	0.0292239	0.0160284	0.016818	0.547024	0.0242479
CCL5	0.0269216	0	0.0314876	0.45961	0.086808
CCR2	0	0.366495	0.0308465	0.0202005	0.0323915
CCR3	0.397605	0.0274343	0.045646	0	0
CD160	0.0599533	0.00303193	0.000942169	0.539249	0.0303094
CD19	0.11087	0.0160285	0.276293	0.0281409	0.0117534
CD1D	0.00946825	0.345175	0.0685786	0	0.0190898
CD22	0.037968	0.0149645	0.366644	0.0151802	0.00577961
CD244	0.0336367	0.105123	0.0122274	0.373068	0.0514993
CD247	0.0243618	0.0146258	0.0222174	0.406024	0.116445
CD28	0.0758701	0	0	0	0.383158
CD33	0.0331756	0.364589	0.0251437	0.0158395	0
CD3D	0.0352011	0.0273755	0.0258239	0.0915967	0.291499
CD3E	0.0458964	0.0171971	0.00532633	0.142312	0.279708
CD3G	0	0.0261682	0.0372376	0.1013	0.307077
CD40LG	0.0524867	0.0145335	0.0236484	0	0.342915
CD5	0.004301	0.0429017	0.075698	0.0250358	0.274213
CD7	0.0172648	0.031555	0.062168	0.342197	0.0894605
CD72	0.0389749	0.0104558	0.313974	0.0652883	0.0245392
CD86	0.0629005	0.276835	0.0529648	0.0177935	0.0243907
CHI3L1	0.465737	0	0	0	0.0347946
CLC	0.308728	0	0.0954627	0.0170285	0.0332203
CREB5	0.359529	0.0710383	0.0106035	0.015721	0.0200152
CST7	0.0524715	0.0278843	0.0465469	0.435767	0.0362355
CTSW	0.00164793	0.0246899	0.0313037	0.524731	0.0414632
CXCR1	0.344762	0	0.049356	0.065017	0.0323265
CXCR2	0.328794	0.0106599	0.0402811	0.0576793	0.0595224
CXCR5	0.0354655	0	0.360762	0	0.0346951
DAPK2	0.351974	0.0136983	0.0048018	0.0633164	0.0457699
FASLG	0.0660735	0.046541	0.0139464	0.43644	0.011303
FCGR3B	0.308448	0.0233664	0.0581115	0.0533268	0.0511516
FCN1	0.0393966	0.375246	0.00973608	0.000609631	0.0222098
FCRL2	0.0914314	0.00404344	0.29758	0.0354256	0.0282443
FPR1	0.35614	0.0558716	0.0616118	0.00865058	0
FPR2	0.375401	0.0218939	0.0212129	0.0286059	0.043351
GNLY	0.000418673	0.0491354	0.0537273	0.491565	0.0196997
GPR171	0.0764355	0	0	0.039182	0.34134
GZMA	0.0300026	0.0286012	0.0338484	0.461035	0.0527865
GZMB	0.0143582	0.0165423	0.0276078	0.592218	0.000330931
GZMH	0.0364583	0	0.00645862	0.566667	0.03386
HAL	0.41662	0.0567638	0	0	0.0175405
HSPA6	0.239963	0.130273	0.043927	0.0219888	0.0388437
ICOS	0.0845448	0.00174397	0.00256865	0	0.345679
IGHD	0.0515534	0.0249203	0.317834	0.0447697	0.00583745
IGHM	0.0608317	0.00048308	0.35643	0.0243369	0.00951937
IL12RB2	0.00109524	0.0521111	0.0379612	0.425797	0.0474974
IL1B	0.0285488	0.34101	0.051481	0.0326264	0.00208039
IL2RB	0.0560121	0.0291199	0.0186652	0.479626	0.0331487
IL7R	0	0.045815	0.0398491	0.0204156	0.339947
ITK	0.0573804	0	0	0.11893	0.308852
KCNA3	0.0011401	0.0369618	0.0899517	0.0746576	0.258136
KIR2DL1	0.0264922	0	0.01469	0.616849	0
KIR2DL4	0.0203785	0.0257582	0.0145183	0.577812	0
KIR2DS4	0.0199833	0.0358046	0.0194956	0.50892	0.0123722
KLRB1	0.0469274	0.00254551	0.00579533	0.458073	0.092751
KLRC3	0.0305111	0.0262172	0.0265549	0.495535	0.0191072
KLRC4	0.027939	0.00821037	0.0127206	0.37619	0.136211
KLRD1	0.00270706	0.0163845	0.0184594	0.596012	0.0176139
KLRF1	0.0475217	0.00571804	0.00863895	0.595192	0
LAIR2	0.0491722	0	0	0.584346	0.0151839
LEF1	0	0.0478264	0.0262833	0.0241907	0.353241
LILRA2	0.362518	0.100023	0.000767378	0.0111309	0.0126113
MARCO	0.0230516	0.300914	0.0536353	0.0586086	0.00577172
MGAM	0.415655	0	0	0.042447	0.0432114
MMP9	0.355151	0.0176281	0.0479758	0.0128724	0.0318454
MS4A1	0.0474031	0.000125815	0.334397	0.0384913	0.0359302
MS4A6A	0.00719712	0.378198	0.0293057	0.0123396	0.0246814
MXD1	0.250952	0.0611161	0.0867297	0.0286432	0.04624
NCR3	0.0245278	0.0489261	0.0647894	0.370876	0.0517985
NKG7	0	0.0425821	0.0494209	0.505201	0.0244576
NPL	0.297124	0.130293	0.0296473	0.000721747	0.0172824
P2RX5	0.0615505	0.0109591	0.297415	0.0279934	0.038864
P2RY13	0.274656	0.160126	0.0211731	0	0.0183814
PNOC	0.050142	0.0453046	0.328481	0.0152791	0
PRF1	0.00498346	0.0108617	0.0194219	0.578771	0.0285046
PRR5L	0.04889	0.0128834	0.0248859	0.486709	0.0360618
PTGDR	0.0477657	0	0	0.585707	0.0186821
PTGER2	0.038622	0.0759506	0	0.383784	0.0770625
PVRIG	0.0601444	0.00451895	0.0559546	0.353688	0.090229
QPCT	0.357402	0.0861279	0.00905738	0	0.0295105
RALGPS2	0.0378253	0.025196	0.338952	0	0.0209163
RASGRP3	0.0711987	0	0.361636	0	0
REPS2	0.270396	0.052401	0.0522562	0.037782	0.0380464
RNASE2	0.0324806	0.395211	0.000632828	0.0315087	0.00102573
SIRPG	0.0235565	0.0493647	0.0317019	0.0162787	0.317934
SLC12A1	0.32581	0.0201874	0.0924434	0.00648018	0.0204853
SPIB	0.0639814	0.037341	0.273091	0.0366048	0.0284186
STAP1	0.0457598	0	0.296231	0.103835	0.0332765
STEAP4	0.286628	0.0946935	0.0721148	0.0207711	0
TBX21	0.0405754	0.00300635	0.0224326	0.550522	0.0106696
TCF7	0	0.0525865	0.0569119	0.0561864	0.27154
TCL1A	0	0.0212738	0.384565	0.0350411	0.00665256
TMEM156	0.0444543	0.00448141	0.280235	0.0537036	0.066609
TNFAIP6	0.399161	0.0100923	0.00831833	0.0534611	0.0239683
TNFRSF13B	0.0656235	0.0366683	0.270723	0.0039398	0.0437579
TNFRSF17	0.0818635	0	0.347905	0.0212618	0
TRAC	0.0577516	0.0369311	0.0371804	0.0275246	0.285182
TRAT1	0.036593	0	0.00629104	0	0.39831
TREM1	0.289884	0.0581945	0.0769811	0.00491471	0.0450815
TRPM6	0.334024	0.0249902	0.0378993	0.0205572	0.0310306
UBASH3A	0.0436479	0.00255184	0.0356712	0.0330506	0.322095
VNN1	0.286263	0.166594	0	0.0187318	0.00551943
VNN2	0.266903	0.073371	0.063304	0.0179508	0.05563
VNN3	0.314919	0.0246921	0.0800868	0.0109132	0.0416189
VPREB3	0.0130276	0.0470642	0.309138	0.0182125	0.0301774
